1 **Article**

2

3 **Title:**

4 **COMPOSITUM 1 (COM1) contributes to the architectural simplification of**  
5 **barley inflorescence via cell wall-mediated and meristem identity signals**

6

7 **Authors:**

8 N. Poursarebani<sup>1</sup>, C. Trautewig<sup>1</sup>, M. Melzer<sup>1</sup>, T. Nussbaumer<sup>3,4</sup>, U. Lundqvist<sup>5</sup>, T. Rutten<sup>1</sup>, T.  
9 Schmutzer<sup>1,2</sup>, R. Brandt<sup>1</sup>, A. Himmelbach<sup>1</sup>, L. Altschmied<sup>1</sup>, R. Koppolu<sup>1</sup>, H. M. Youssef<sup>1,2,6</sup>, M.  
10 Dalmais<sup>7</sup>, A. Bendahmane<sup>7</sup>, N. Stein<sup>1</sup>, Z. Xin<sup>8</sup>, T. Schnurbusch<sup>1,2</sup>

11

12 **Affiliations:**

13 <sup>1</sup>Leibniz Institute of Plant Genetics and Crop Plant Research (IPK), Corrensstr. 3 OT Gatersleben,  
14 D-06466 Seeland, Germany

15 <sup>2</sup>Martin Luther University Halle-Wittenberg, Faculty of Natural Sciences III, Institute of  
16 Agricultural and Nutritional Sciences, 06120 Halle, Germany

17 <sup>3</sup>Technical University of Munich and Helmholtz Center Munich, Institute of Environmental  
18 Medicine, UNIKA-T, Neusäßer Str. 47, 86156 Augsburg, Germany

19 <sup>4</sup>Helmholtz Zentrum München (HMGU), German Research Center for Environmental Health,  
20 Institute of Network Biology (INET), 85764 Neuherberg, Germany

21 <sup>5</sup> Nordic Genetic Resource Center (NordGen), Smedjevägen 3, Box P.O. 41, SE-230 53 Alnarp,  
22 Sweden

23 <sup>6</sup> Faculty of Agriculture, Cairo University, Giza, Egypt

24 <sup>7</sup> INRAE, CNRS, Institute of Plant Sciences Paris-Saclay IPS2, Univ Paris Sud, Univ Evry, Univ  
25 Paris-Diderot, Sorbonne Paris-Cité, Université Paris-Saclay, 91405 Orsay, France

26 <sup>8</sup> USDA-ARS, Plant Stress and Germplasm Development Unit, Cropping Systems Research  
27 Laboratory, Lubbock, TX 79415, USA

28

29 \*Corresponding authors. Email: Poursarebani@ipk-gatersleben.de (NP); Schnurbusch@ipk-  
30 gatersleben.de (TS)

31

32

33

34

35

36

37

38

39

40

41 **Abstract:**

42 Grasses have varying inflorescence shapes; however, little is known about the genetic mechanisms  
43 specifying such shapes among tribes. We identified the grass-specific TCP transcription factor  
44 COMPOSITUM 1 (COM1) expressed in inflorescence meristematic boundaries of different  
45 grasses. COM1 specifies branch-inhibition in *Triticeae* (barley) versus branch-formation in non-  
46 *Triticeae* grasses. Analyses of cell size, cell walls and transcripts revealed barley COM1 regulates  
47 cell growth, affecting cell wall properties and signaling specifically in meristematic boundaries to  
48 establish identity of adjacent meristems. *COM1* acts upstream of the boundary gene *Liguleless1*  
49 and confers meristem identity independent of the *COM2* pathway. Furthermore, COM1 is subject  
50 to purifying natural selection, thereby contributing to specification of the spike inflorescence shape.  
51 This meristem identity module has conceptual implications for both inflorescence evolution and  
52 molecular breeding in *Triticeae*.

53

54

55

56

57

58

59

60

61

62 **Main Text:**

63

64 The grass family (Poaceae), one of the largest angiosperm families, has evolved a striking diversity  
65 of inflorescence morphologies bearing complex structures such as branches and specialized  
66 spikelets<sup>1</sup>. These structural features are key for sorting the grass family into tribes<sup>1</sup>. Current grass  
67 inflorescences are proposed to originate from a primitive ancestral shape exhibiting “a relatively  
68 small panicle-like branching system made up of primary and secondary paracladia (branches), each  
69 one standing single at the nodes”<sup>2</sup> (**Fig. 1A**). This ancestral panicle-like inflorescence is also  
70 known as a compound spike<sup>3-5</sup>. Several independent or combined diversification processes  
71 throughout the evolutionary history of the grass family have resulted in the broad diversity of  
72 today’s grass inflorescences<sup>2,3,6</sup>. Some tribes, e.g. *Oryzaceae* (rice) and *Andropogoneae* (maize and  
73 sorghum), still display ancestral and complex compound shapes, keeping true-lateral long primary  
74 and secondary branches. Other grasses, such as *Brachypodium distachyon*, show lower  
75 inflorescence complexity with branch length and number reduced to lateral, small pedicels ending  
76 in only one multi-floretted spikelet (**Fig. 1A–C**). Inflorescences within the tribe *Triticeae*, e.g.  
77 barley (*Hordeum vulgare* L.), probably evolved from the ancestral compound spike into the typical  
78 unbranched spike (**Fig. 1D**). The spike displays the least-complex inflorescence shape due to the  
79 sessile nature of spikelets and reduction in rachis internodes<sup>2,7</sup>. Architectural variation is often  
80 manifested through subtle modifications of transcriptional programs during critical transitional  
81 windows of inflorescence meristem (IM) maturation<sup>7,8</sup> or functional divergence of key  
82 transcriptional regulators and/or other genes<sup>9,10</sup>. Identification of key genetic determinants is  
83 crucial for better understanding and explaining both the origin of grass inflorescence diversity and  
84 grass developmental gene evolution. Inflorescence developmental patterning controls pollination,

85 grain set and grain number, and is thus highly relevant to agronomy as a target of natural and human  
86 selection.

87

## 88 **Results**

### 89 **Atypical for *Triticeae*—barley *com1.a* mutant forms a branched inflorescence**

90 To provide insight into the inflorescence architecture of *Triticeae*, we conducted a detailed  
91 phenotypic inspection of an induced barley mutant displaying non-canonical, i.e. branched, spike  
92 morphology. Barley (and other *Triticeae*) wild-type (Wt) unbranched spikes are typically  
93 composed of sessile, single-flowered spikelets arranged in a regular distichous fashion of two  
94 opposite rows directly attached to the main axis (**Fig. 1E**). The Compositum-Barley *com1.a*  
95 (*compositum 1.a*) is an induced mutant with a branched spike introgressed into the two-rowed *cv.*  
96 Bowman (BW) (**Supplementary Fig. 1**). The BW near isogenic line (NIL) of the *com1.a* allele,  
97 BW-NIL(*com1.a*), is a backcross (BC6)-derived EMS/neutron-induced mutant from *cv.* Foma<sup>11</sup>].  
98 The inflorescence in this mutant develops a ramified or branched architecture, resembling an  
99 ancestral compound spike (**Fig. 1E–I**), but lacks an organ called pulvinus. The pulvinus is present  
100 at the axil of lateral long branches in panicles and compound spikes of non-*Triticeae* grass species,  
101 defining branch angle extent. We observed differences in spike shape between BW and *com1.a*  
102 during early spike differentiation at the triple mound (TM) to early glume primordium (GP; in  
103 which the mutant central spikelet meristem (SM) is elongated; **Fig. 1J**) stage, becoming more  
104 apparent during later reproductive stages of late glume primordium onwards (**Fig. 1K–N**). At GP,  
105 predominantly in the basal part of the spike, meristems of the central spikelet positions undergo  
106 apparent floral reversion, displaying branch- or IM-like meristems (**Fig. 1N**). Instead of generating  
107 florets, the meristem potentially grows indefinitely and functions as an indeterminate spikelet  
108 multimer in the form of a primary branch-like structure (**Fig. 1M–N**). Such branch-like structures

109 occasionally replace other spikelet-related organs, such as the rachilla primordium (RP, the spikelet  
110 axis) or glumes (**Fig. 1M–N**). The *com1* branching phenotype resembles that of the previously  
111 described *compositum 2* mutant, *com2*, in which formation of branch-like structures results from  
112 lack of SM identity (in Supplementary Fig. 4 of <sup>12</sup>).

113

#### 114 **COM1 restricts palea cell size by thickening their cell walls**

115 Besides the branch phenotype, *com1.a* exhibits a deviation in adaxial palea morphology, having a  
116 flat plane (**Fig. 1O**) versus the conventional distinct infolding observed in BW (**Fig. 1P**), *cv.* Foma,  
117 and wild barley (*H. vulgare* subsp. *spontaneum*). This deviation was visible in all paleae  
118 independent of their position along the spike. Histological analyses using cross sections of paleae  
119 middle-areas (**Fig. 1O**) revealed distinct features of *com1.a* in which sclerenchymatous cells, in  
120 particular, were expanded in size and numbers (**Fig. 1Q–R**). Cell expansion is thought to be tightly  
121 linked to cell wall extensibility <sup>13,14</sup>. We used transmission electron microscopy (TEM) to verify  
122 whether *com1.a* palea cells had altered cell wall features. Notably, mutant palea cells had clearly  
123 thinner cell wall structures, thus fewer mechanical obstructions for cell expansion, indicating that  
124 COM1 functions as a regulator of cell growth via cell wall modifications (**Fig. 1S–Z and**  
125 **Supplementary Fig. 2**). Moreover, mutant paleae generally formed three vascular bundles (VB)  
126 (**Fig. 1Q**) compared with two VBs in BW (**Fig. 1R**). By analogy to changes in palea cell walls,  
127 such alterations might also explain the rescission of SM identity, providing that COM1 similarly  
128 affects cell wall integrity in meristematic cells, e.g. SM cells or boundary cells (cells separating IM  
129 from SMs) (see below).

130

131 **COM1 encodes a TCP transcription factor that inhibits inflorescence branching independent**  
132 **of COM2**

133 To investigate the genetic basis of the *com1.a* phenotype, we constructed a genetic map by  
134 screening ~6,000 gametes for recombination events in an F<sub>2</sub> population (Bowman × *com1.a*)  
135 followed by further analysis of F<sub>3</sub> families (**Supplementary Fig. 1C–F, Supplementary Table 1,**  
136 **2 and 3**) (**Supplementary Note**). This delimited a ~1.4 Mb interval carrying eight genes, one of  
137 which is a predicted transcription factor (HORVU 5Hr1G061270) entirely absent in *com1.a*, likely  
138 due to an induced deletion (**Fig. 2A**). The remaining seven genes either were not expressed or not  
139 differentially regulated between Wt and *com1.a* mutant (see below, the transcriptome analysis)  
140 (Fig1. A). To validate our candidate gene, we sequenced it in a barley TILLING population and in  
141 a set of 20 induced barley spike-branching mutants. We identified five branched mutants  
142 (*Mut.3906*, *int-h.42*, *int-h.43*, *int-h.44* and *com1.j*) missing the same transcription factor as *com1.a*  
143 (**Supplementary Fig. 3, Supplementary Table 1 and 4**) and six TILLING mutants with non-  
144 synonymous amino acid substitutions (**Fig. 2B; Supplementary Figs. 4–5; Supplementary Table**  
145 **4**). *Mut.3906* was used for confirming allelism with *com1.a* (**Supplementary Note**). Together,  
146 these data confirmed unambiguously that the transcriptional regulator was responsible for the  
147 spike-branching phenotype in *com1.a*. Annotation analysis of the COM1 protein showed that it  
148 belongs to the plant-specific TCP (Teosinte branched1 (TB1)/Cycloidea/Proliferating Cell Factor)  
149 transcription factor family; COM1 contains 273 amino acids and features one basic helix-loop-  
150 helix TCP domain (**Fig. 2B**). Proteins of the TCP family fall into two classes, with COM1  
151 belonging to class II, subclass CYC/TB1<sup>15,16</sup>.

152 We detected a higher phenotypic penetrance for spike-branching in *com1.a* (96.3%) compared to  
153 *com2.g* (78%). Double mutant (DM) plants outperformed either single mutant in grain number per  
154 spike, and supernumerary spikelet and branch production. Moreover, DM plants showed additional  
155 floral reversion in lateral spikelet positions (**Supplementary Fig. 6; Supplementary Note**), further  
156 indicating that the two loci act independently/additively in branch inhibition in barley.

157 **Barley COM1 function evolved under purifying natural selection and affects boundary**  
158 **signaling**

159 We next asked whether COM1 has experienced functional conservation or divergence within the  
160 grasses and whether its sequence composition supports possible functional alteration. We used the  
161 comprehensive phylogenetic analyses available for grass TCPs<sup>16</sup> and the references therein) as a  
162 starting point for our own COM1-specific phylogenetic analyses. We identified first- and second-best  
163 (closest) homologs (FBH and SBH) of COM1 from sequenced grass genomes, including rice,  
164 maize, sorghum, hexaploid wheat and *Brachypodium distachyon*, as well as *Arabidopsis thaliana*  
165 (**Fig. 2C**). The homolog of maize TB1, obtained from the aforementioned grasses, was added as  
166 an out-group to the phylogeny. Our phylogenetic analysis confirmed that COM1 is restricted to  
167 grasses (**Fig. 2C**)<sup>17-19</sup>. The FBHs of COM1 in maize and rice were reported previously as  
168 *ZmBAD1/WABI* and *OsREPI/DBOP* (60.3% and 65.5% sequence similarity to COM1),  
169 respectively<sup>17-20</sup>. Except for maize, none of the COM1 FBHs showed a duplicated copy (no in-  
170 paralogous resulting from within-genome duplication after a speciation,<sup>21</sup> (**Supplementary Fig. 7A–**  
171 **B**)). Instead, COM1 seems to be an out-paralog<sup>21</sup> of SBHs including the sorghum gene *SbMSDI*  
172 (44.1% sequence similarity to COM1)<sup>22</sup>. Functional characterization of COM1 homologs is only  
173 available for maize and rice (Table 1)<sup>17-19</sup>.

174 Maize *BAD1/WABI* transcripts are mainly detected at the IM-to-BM (branch meristem) boundary  
175 region as well as between pulvinus and lateral branches (in Fig. 3J of<sup>18</sup>). Consequently, loss-of-  
176 function *bad1/wab1* mutants display organ fusion (a known boundary formation defect) resulting  
177 in reduced branch number (from 5.8 in Wt to 1.3 in mutant siblings) and angle size, and more  
178 upright tassel branches<sup>17,18</sup>. This gene was dubbed a boundary formation gene promoting lateral  
179 meristem (e.g. branch) and axillary organ (e.g. pulvinus) formation in Wt maize<sup>17,18</sup>.



180 Our TILLING analysis for the *BADI/WABI* ortholog in sorghum revealed one mutant (ARS180  
181 line; A144T) with both upright tassel branches (10.95° in Wt vs. 5.2° in mutant,  $P \leq 0.001$ ; **Fig. 3**,  
182 **Supplementary Table 5**) and reduced primary branch number per node (5.4 in Wt vs. 4.2 in  
183 mutant,  $P \leq 0.05$ ; **Supplementary Table 5**). These data suggest a similar positive role of sorghum  
184 *BADI/WABI* in pulvinus development and branch initiation/formation, revealing functional  
185 conservation of the protein between sorghum and maize. Moreover, we detected no obvious change  
186 in sorghum palea morphology except one additional vascular bundle, similar to maize (**Table 1**).  
187 The rice homolog of *COM1*, *OsREPI/DBOP*, shows a major effect in promoting palea identity,  
188 growth and development, with no effect on branch angle or branch initiation<sup>19,20</sup>. Loss-of-function  
189 mutants display smaller paleae due to less differentiation and severely reduced size of palea cells;  
190 a clear contrast to palea defects in barley (**Table 1**). Our TILLING analysis of *COM1* homologs in  
191 *Brachypodium distachyon* (*Bd*) identified several mutants. Phenotypic investigation of two lines  
192 (5446: Q116\* and 8373: S146N) (**Supplementary Table 4, Supplementary Note**) revealed  
193 similar phenotypes to the aforementioned non-*Triticeae* species (**Table 1**) (**Fig. 3F–P**). Similarly,  
194 we observed a palea defect (**Fig. 3G**) but histological analyses revealed no changes in cell  
195 expansion, except the formation of one additional vascular bundle in each mutant (**Fig. 3L–M**).  
196 We also observed a reduction in branch angle because of smaller or absent pulvini; however, the  
197 number of lateral branches was not altered in either *Brachypodium* mutants (**Fig. 3O–Q**). In  
198 conclusion, *COM1* homologs within non-*Triticeae* grasses primarily promote boundary formation  
199 and cell differentiation (as in rice palea)/proliferation (as seen for pulvinus) (**Table 1**) but also  
200 contribute to formation of lateral axillary organs, e.g. branch or pulvinus, creating more complex  
201 inflorescence structures.

202 To better understand the contrasting *COM1* function of branch-inhibition in barley versus branch-  
203 formation in non-*Triticeae* grasses, we analyzed barley *COM1* expression using qRT-PCR and

204 semi-qPCR (Fig. 4A-C) followed by mRNA *in-situ* hybridization (**Fig. 4D-G**). Barley *COM1*  
205 transcripts were detected in paleae (**Fig. 4C, F-G**), VB of the rachis (Fig. 4E), and importantly at  
206 the base of forming SMs throughout the boundary region separating SMs from IM (IM-to-SM  
207 boundary) and between lateral and central SMs (**Fig. 4E-F**), similar to non-*Triticeae* grass species,  
208 e.g. maize. This expression pattern suggests involvement of barley *COM1* in specification of the  
209 spikelet meristematic boundary. However, since central and lateral spikelets do not fuse into each  
210 other or to the IM (as long branches do in maize or sorghum), barley *COM1* may not be involved  
211 in boundary formation *per se*. In combination with our cell wall analysis in palea cells, this implies  
212 that barley *COM1* may be involved in formation of meristem identity signals released from the  
213 boundary region through thickened cell walls encompassing boundary cells; thus, *COM1* affects  
214 boundary signaling via cell wall modifications <sup>23</sup>. Recently acquired protein motifs specific to  
215 *Triticeae* *COM1* may support this functional modification (**Fig. 2D** Motifs 7, 13, 15 and 17 **and**  
216 **Supplementary Fig. 8**).

217 We checked whether natural selection has acted upon barley *COM1* sequence composition and  
218 function, and consequently formation of unbranched spikes in barley. Re-sequencing of the barley  
219 *COM1* coding sequence in a panel of 146 diverse barley landraces and 90 wild barleys <sup>24,25</sup>  
220 (**Supplementary Table 6**) revealed very little natural sequence variation (site diversity of  $\pi =$   
221 0.0006). Eleven SNPs resulted in a simple 12-haplotype network (**Supplementary Fig. 9**)  
222 comprising only two main haplotypes, neither of the 12 showed mutant spike or palea phenotypes  
223 (**Supplementary Fig. 9**). This suggests that barley *COM1* underwent purifying natural selection  
224 most likely for maintaining inflorescence shape.

225

226 **Putative transcriptional regulation for barley spike**

227 To further examine the molecular basis of COM1 branch inhibition within the barley spike, we  
228 performed qRT-PCR to locate *COM1* relative to other previously known spike architecture genes  
229 (**Fig. 5A**, black arrows). We localized *COM1* downstream of *VRS4* (*HvRA2*; orthologous to maize  
230 *RAMOSA2*), the main regulator of row type and branch inhibition<sup>7,12</sup> (**Supplementary Fig. 10**).  
231 *COM2* transcript levels in immature spikes of *com1.a* were slightly lower only during later stages  
232 of development (**Supplementary Fig. 10F**).

233 We performed comparative RNA-seq using mRNAs from immature spikes of BW and *com1.a* as  
234 well as the mutant progenitor, *cv. Foma*, when spike patterning begins to differ between genotypes,  
235 plus two subsequent stages (**Figs. 1 and 5B; Online Materials**). Differentially expressed (DE)  
236 genes were identified in comparisons of *com1.a* versus BW and mutant versus *cv. Foma*. We found  
237 83 genes (Log2 FoldChanges; LFC |  $\geq 0.5$ ; adjusted  $P < 0.05$ ) DE in at least one stage in both  
238 comparisons (**Fig. 5; Supplementary Figs. 11–12; Supplementary Source Data 1**): 18 and 65 genes  
239 up- and downregulated in BW-NIL(*com1.a*), respectively.

240 Among significantly downregulated genes across all three stages (**Fig. 5B**), we detected one  
241 *SQUAMOSA PROMOTER-BINDING-LIKE 8* gene (*SPL8*, HORVU2Hr1G111620) homologous  
242 to the boundary gene *LIGULELESS 1* in maize (*LG1*; *ZmSPL4*), rice *OsLG1* (*OsSPL8*) and  
243 hexaploid wheat *TaLG1* (*TaSPL8*)<sup>26</sup>. Similar to the known maize module  
244 (*RA2* → *WABI/BADI* → *LG1*; <sup>17,18</sup>, we found that *VRS4/HvRA2* → *COM1* → *HvLG1* regulation  
245 appears to be maintained in barley. Transcriptome analysis of leaf tissues in a wheat *liguleless1*  
246 mutant revealed *TaSPL8* as a cell wall-related gene<sup>26</sup>. Notably, no spike-branching phenotype was  
247 reported for this erected-leaf *liguleless* mutant, most likely due to genetic redundancy.

248 Among other significantly downregulated genes in *com1.a*, we found important genes associated  
249 with cell wall properties and integrity (**Fig. 5D**). These include HORVU5Hr1G006430, a leucine-  
250 rich repeat receptor kinase (LRR-RLK), and HORVU3Hr1G030260 belonging to the cytochrome

251 P450 superfamily. LRR-RLKs and CYP450s are involved in lignin deposition to cell walls upon  
252 cellulose biosynthesis inhibition and during lignin biosynthesis *per se*, respectively <sup>27,28</sup>. Other cell  
253 wall-related genes include two genes encoding xyloglucan endotransglucosylase/hydrolase (XTH)  
254 25 (HORVU7Hr1G098280 and HORVU7Hr1G098260) and barley *Low Silicon Influx 1 (HvLSI1*;  
255 *HORVU6Hr1G075850)* <sup>29</sup>, both downregulated in the mutant. These cell wall-related genes may  
256 support *COM1* involvement in regulation of cell wall mechanics of palea cells and the IM-to-SM  
257 boundary, and indirectly, putative signaling required for acquiring SM identity.

258

## 259 **Discussion**

260 Here we report that barley *COM1* affects cell growth through regulation of cell wall properties  
261 specifically in palea and IM-to-SM boundary cells; the latter provide identity signals to barley  
262 SMs <sup>30</sup>. Signaling to the SM to establish its identity is a key genetic switch by which barley  
263 inflorescences acquire spike architecture, not seen in non-*Triticeae* grasses.

264 *COM1* is present only in grasses, with no true *Arabidopsis* ortholog; intriguingly, we observed  
265 functional modification of *COM1* between barley and non-*Triticeae* grass species. The  
266 modification in *COM1* function was clear by comparing mutant versus wild type inflorescence  
267 phenotypes across grass species, and was further elucidated by our analysis at the  
268 cellular/molecular level. At the phenotypic level, barley *COM1* inhibits spike-branching to  
269 simplify floral architecture; whereas in non-*Triticeae* *COM1* homologs promote formation of  
270 lateral branches (e.g. up to 60% more branches in maize when compared to mutants <sup>18</sup>) to sustain  
271 the ancestral inflorescence complexity.

272 At the cellular level in non-*Triticeae* grasses, *COM1* has evolved as a boundary formation factor,  
273 its putative ancestral role (**Fig. 5C-D**). Consequently, loss-of-function of *COM1* homologs  
274 result in lack of boundaries and subsequent organ fusion, e.g. BM into IM as demonstrated by a

275 low number of lateral branches in maize mutants. Notably, this loss of function did not change  
276 the overall inflorescence architecture in non-*Triticeae* grasses. Barley *com1* loss-of-function,  
277 however, increases branch formation/extension mostly from SMs, a clear deviation from the  
278 canonical spike form. As barley *COM1* displayed a similar boundary mRNA expression as seen  
279 in maize, we presume that barley *COM1* functions through boundary signaling<sup>30</sup>, thereby  
280 affecting the identity of adjacent SMs. The formation of boundary regions in barley *com1*  
281 mutants (no organ fusion) via pathway(s) independent of *COM1* (**Fig. 5E-F**), and thus separation  
282 of meristematic zones in this mutant, implies that barley IM-to-SM boundary cells fail to deliver  
283 proper identity-defining signals to SMs. This signaling failure may perturb transcriptional  
284 programs required to establish identity in barley SMs; such meristems eventually revert back to  
285 IM-like meristems forming a branch-like structure (**Fig. 5F**). The function of the boundary, and  
286 boundary-expressed genes (e.g., maize *RAMOSA1-3*), as a signaling center for adjacent meristems,  
287 e.g. SMs, has been proposed in grasses, yet features of these signals remain unknown<sup>30</sup>. Signals  
288 associated with *COM1* might include micromechanical forces derived from formation of rigid  
289 cell walls enclosing boundary cells. Involvement of *COM1* in printing such mechanical  
290 regulation is supported by our anatomical analysis of palea cell walls and further confirmed by  
291 our transcriptome analysis of immature barley spike samples. *HvLGI*, *HvLSI* and genes encoding  
292 one LRR-RLK, one CYP450 and two XTHs were among the most downregulated in the mutant  
293 and involved in defining cell wall properties<sup>26-28,31</sup>. The contribution of boundary cell wall  
294 mechanics in guiding organogenesis within reproductive tissues has been well described in dicot  
295 species<sup>32</sup>.

296 Such functional modification usually includes constraints on expression patterns, protein  
297 sequence/structure or participation in molecular networks, often assumed to be associated with  
298 gene duplication<sup>21</sup>. Notably, *COM1* shows no sign of duplication within the barley genome and

299 as mentioned above displays a similar expression pattern to maize<sup>17,18</sup>. Thus, COM1's  
300 functional modification and implication in boundary-derived signaling seem to be associated  
301 with its protein sequence (**Fig. 2D**) and the respective downstream molecular networks.  
302 Furthermore, COM1's role in regulating floral complexity-levels in grasses fits well with the  
303 view that TCP transcription factors are growth regulators and evolutionary architects of plant  
304 forms that create diversity<sup>33</sup>. They influence the final architecture of plants in response to  
305 endogenous and/or external conditions. Thus, the barley floral reductionism (from compound  
306 spike to spike form; **Fig. 1A-D**) contributed by COM1, might be a response to the ecological  
307 expansion of the *Triticeae* into more temperate climates<sup>3</sup>.

308 In summary, our findings enabled identification of a barley SM identity module, *VRS4 (HvRA2)*  
309  $\rightarrow$  *COM1*  $\rightarrow$  *HvLGI*, which works independently of *COM2* and inhibits spike-branching via  
310 boundary-defined signals (**Fig. 5A and Supplementary Fig. 12**). Our model of branch-inhibition  
311 in barley spikes opens a new window into grass inflorescence evolution and molecular crop  
312 breeding, and the elevated grain number per spike in *com1.a/com2.g* double mutants supports this  
313 notion.

314

## 315 **Methods**

### 316 **Barley Plant material**

317 The Nordic Genetic Resource center, the National Small Grains Collection (US Department of  
318 Agriculture), and the IPK gene bank were inquired to access 'Compositum-Barley' mutants  
319 (Supplementary Table 4). Bowman near isogenic line carrying *com1.a* allele ((i.e., BW-  
320 NIL(*com1.a*); syn. BW189 or CIho 11333)), its two-rowed progenitor Foma and Wt barley cv.  
321 Bowman were used for phenotypic descriptions, whole genome shotgun sequencing (WGS) (see

322 below) as well as SEM analysis. Plant material used to generate mapping populations is reported  
323 in the corresponding section for genetic mapping. For haplotype analysis, a core collection  
324 including of 146 diverse barley landraces and 90 diverse wild barleys were sequenced <sup>24,25</sup>  
325 (Supplementary Table 6).

326

### 327 **Plant phenotyping**

328 **Barley;** For phenotyping the mapping population, barley BW-NIL(*com1.a*) , Bowman and the  
329 corresponding segregating populations (F<sub>2</sub> and F<sub>3</sub>) were grown side by side under greenhouse  
330 conditions at the IPK. For a plant to be assigned as a branched spike mutant, spike shape at all  
331 tillers was visually inspected for presence of at least one extra spikelet at any rachis node. Grain  
332 related characters such as weight, number, etc. were also measured at harvest for the two parental  
333 lines of the mapping population. In case of phenotyping of the barley TILLING population (see  
334 below and the Supplementary Table 4), other induced mutants (Supplementary Table 4) as well as  
335 the BW-NIL(*com1.a*) / BW-NIL(*com2.g*) double mutants (see below), visual phenotyping for  
336 variation in palea structure was also applied in addition to the aforementioned phenotyping  
337 approach used for spike branching in F<sub>2</sub> and F<sub>3</sub> progenies. In case of TILLING, from the six  
338 mutants for which the spike-branching phenotype was observed at M4, only three (carrying  
339 mutation inside the protein domain; M4.15104, M4.4406, and M4.2598) were subjected for further  
340 study at M5 generation. For which, one M4 plant was selected from which 16 M5 plants were  
341 grown and phenotyped.

342 ***Brachypodium distachyon*:** An already published TILLING population and the corresponding Wt  
343 accession Bd21-3 were used for phenotyping <sup>34</sup>. That included measurement of branch angle, as  
344 proxy for pulvinus size, spikelet number per spike, floret number per spikelet and palea structure.

345 Hence, per M4 plants, only homozygous M5 plants either with mutant genotype aa (3 to 4 plants)  
346 or wild type bb (3 to 4 plants) were selected. Per M5 plants, 10 M6 plants were grown under  
347 greenhouse conditions at the IPK and used for measurement. Thus, 30 to 40 plants per group and  
348 for each plant angles of basal spikelets in main tillers were considered for measurement. To this  
349 end, spikes were first imaged and then imported to the ImageJ tool  
350 (<https://imagej.nih.gov/ij/index.html>) for angle measurement. In case of original wild type Bd21-  
351 3, five plants were grown and measured. The same set of plants and the corresponding spike images  
352 were used to calculate number of spikelets per spike and number of floret per spikelet. In case of  
353 palea phenotyping: paleae were visually inspected across all spikes per plant. We detected plants  
354 with paleae being sensitive to exogenous finger-pressure, and thus such plants were scored as  
355 mutants. A gentle finger-pressure led the mutant paleae to crash from the middle longitude-line so  
356 that a scissors-like structure was formed (Fig. 3G). The crashing was not evident in Wt plants even  
357 with severe exogenous hand-pressure.

358

359 **Sorghum:** An already published TILLING population and the corresponding Wt accession  
360 BTx623 were used for phenotyping <sup>35</sup>. To measure primary branch number and angle, 5 to 8 plants,  
361 either M5 or M6 generations, per family including a Wt sorghum family cv. BTx623 were grown  
362 under greenhouse conditions at the IPK. Average branch number per panicle, e.g. per plant, was  
363 calculated by counting all branches that originated per each rachis node (Supplementary Table 5).  
364 The Average branch number per family was then used to compare with the same value obtained  
365 from Wt family BTx623. To measure the branch angle, for each plant 3 to 4 basal nodes per panicle  
366 were separately photographed. Each node contained at least 1 and up to 5 lateral branches. To cover  
367 angles of each individual branch per node, each node was photographed multiple time. Images



368 were then imported to ImageJ for angle measurement as described for *Brachypodium* (see above).  
369 Spikelet organs of palea and glume as well as overall grain set were also visually inspected for any  
370 visible alteration.

371

## 372 **Marker development**

373 Bowman near isogenic line BW-NIL(*com1.a*) and two-rowed progenitor of *com1.a*, cv. Foma,  
374 were survey sequenced using WGS approach (see below). These sequence information were  
375 compared against already available WGS of Bowman<sup>36</sup>, as present in **Supplementary Fig. 1**.  
376 Polymorphisms e.g. SNPs detected from this comparison (named as Next Generation Sequencing  
377 based markers (NGS-based markers)) between the two parental lines were converted to restriction  
378 enzyme based CAPS (<http://nc2.neb.com/NEBcutter2/>) markers to derive a restriction based  
379 genetic marker as previously described<sup>12</sup>. The developed genetic markers (**Supplementary Table**  
380 **1**) were used to screen the corresponding mapping population.

381

## 382 **Genetic mapping and map-based cloning of *com1.a***

383 *com1.a* was initially proposed to be located in chromosome 5HL with unknown genetic position  
384<sup>11</sup>. A barley F<sub>2</sub> mapping population was developed by crossing Bowman introgression line BW-  
385 NIL(*com1.a*) and barley cv. Bowman. For initial mapping 180 individuals were analyzed and  
386 genotyped using the aforementioned NGS based markers. The pattern of segregation between  
387 mutant and Wt F<sub>2</sub> plants fitted a 3:1 ratio typical for a monogenic recessive gene. Linkage analysis  
388 of segregation data was carried out using maximum likelihood algorithm of Joinmap 4.0. Kosambi  
389 mapping function was used to convert recombination fractions into map distances. The linkage

390 mapping was further followed by a high-resolution genetic mapping in which almost 6,000 gametes  
391 were screened with the flanking markers NGS045 and NGS049. For narrowing down the *com1.a*  
392 genetic interval; the identified recombinants (a set of 109) were used. From 109, a set 15 F<sub>2</sub> were  
393 labeled (**Supplementary Table 2-3**) to be critical recombinants for precisely defining the *com1.a*  
394 genetic interval. From each of the 15 critical plants, 16 F<sub>3</sub> progenies were evaluated for their  
395 phenotypes and marker genotypes at the *com1.a* candidate gene. (**Supplementary Table 2 and**  
396 **S3**). Based on F<sub>2</sub> high-resolution mapping and F<sub>3</sub> genetic analysis described, two tightly linked  
397 markers, NGS084 and NGS094, were taken to harvest the available barley genome BAC  
398 sequence data (data not shown). A single BAC contig spanning 1.4 Mb of the minimal tiling  
399 path (MTP) was identified. Genes in this region were utilized for marker development and  
400 further genetic mapping that resulted in identification of a ~380 kb region deleted in the mutant  
401 BW-NIL(*com1.a*). The deleted fragment contains a single gene, i.e., *com1.a*.

402

#### 403 **Allelism test of *com1* mutants.**

404 Mut.3906 mutant (**Supplementary Table 4**) was crossed with BW-NIL(*com1.a*) to test for  
405 allelism. The resultant F<sub>1</sub> plants showed a mutant spike phenotype confirming its allelism with  
406 *com1*. All alleles showed phenotypic similarities with *com1* and mutations in the *COM1* gene  
407 sequences.

408

#### 409 **Double-mutant analysis**

410 Double mutants (DM) were generated by crossing mutant BW-NIL(*com1.a*) to BW-NIL(*com2.g*),  
411 followed by selfing of the F<sub>1</sub> progeny. All obtained 183 F<sub>2</sub> plants were subsequently genotyped

412 **(Supplementary Table 1)**. In case of *com2.g* mutation detection, a primer pair (Com2-  
413 Bw\_Sfil\_FR; **Supplementary Table 1**) spanning the A300C haplotype (that differentiate the Wt  
414 Bowman allele A from *com2.g* mutant C allele at position 300bp<sup>12</sup> were used for sequencing and  
415 to classify F<sub>2</sub> genotypes for the *com2* locus. Thus, genotypic classes include C300C allele as  
416 homozygous mutant, AA as Wt and CA as heterozygous. In case of *com1.a*, a presence/absence  
417 marker was used (**Supplementary Table 1**), where absence of the *COM1* gene was considered as  
418 homozygous *com1.a* mutant. A total number of five plants were recovered as homozygous double  
419 mutants (from 183 F<sub>2</sub> plants) (**Supplementary Note**) that were used for generating F<sub>3</sub> plants used in  
420 subsequent DM phenotypic analysis (**Supplementary Fig. 6**). Two DM F<sub>3</sub> families, each  
421 consisting of 20 plants along with 20 plants from each of the single mutants and 20 wild type cv.  
422 Bowman plants, were grown and used for phenotyping (**Supplementary Fig. 5 and 6**).

423

#### 424 **TILLING analysis**

425 **Barley:** For identifying further mutant alleles of *COM1* in barley TILLING populations including  
426 EMS (Ethyl methanesulfonate) treated population of cv. Barke consisting 10279 individuals were  
427 screened<sup>37</sup>. A primer combination (**Supplementary Table 1**) was used to amplify the coding  
428 region of the *COM1* gene. The amplicon was subjected to standard procedures using the  
429 AdvanCETM TILLING kit as described in<sup>12</sup>. Amplified products were digested with dsDNA  
430 cleavage kit followed by analysis via mutation discovery kit and gel-dsDNA reagent kit. These  
431 were performed on the AdvanCETM FS96 system according to manufacturer's guidelines  
432 (advancedanalytical, IA, USA). The amplified ORF was also re-sequenced by Sanger sequencing  
433 using primers listed in **Supplementary Table 1**.

434 ***Brachypodium distachyon***: Mutation detection screenings were performed in the TILLING  
435 collection of chemically induced *Brachypodium* mutants, described in <sup>34</sup>. TILLING by NGS  
436 consists to sequence 500 bp PCR fragments libraries prepared from 2600 individual genomic DNA  
437 pooled in two dimensions. A dual indexing system, one placed on the 5'adaptater, and the second  
438 one on the 3'adaptater, added by a two-step PCR (for primer sequence; see **Supplementary Table**  
439 **1**) allow a direct identification of the sequence identities. The first PCR amplification is a standard  
440 PCR with target-specific primers carrying Illumina's tail (**Supplementary Table 1**) and 10 ng of  
441 *Brachypodium* genomic DNA. Two microliter of the first PCR product served as a template for the  
442 second PCR amplification, with a combination of Illumina indexed primers (**Supplementary**  
443 **Table 1**). The sequencing step of PCR fragments was done on an Illumina Miseq personal  
444 sequencer using the MiSeq Reagent Kit v3 (Illumina<sup>®</sup>) followed by quality control processes for  
445 libraries using the PippinHT system from SAGE Sciences for libraries purification, and the  
446 Bioanalyzer<sup>™</sup> system from Agilent<sup>®</sup>. To identify induced mutations, a bioinformatic pipeline,  
447 called "Sentinel" was used to analyze the data sequences  
448 (IDDN.FR.001.240004.000.R.P.2016.000.10000). Prediction of the impact of each mutation  
449 (**Supplementary Table 4**) was made with SIFT software as described in in <sup>34</sup>. The amplified ORF  
450 was also re-sequenced by Sanger sequencing using primers listed in **Supplementary Table 1**.

451 **Sorghum**: A pedigreed sorghum mutant library was established in the inbred line BTx623, which  
452 was used to produce the sorghum reference genome. This mutant library consists of 6400 M4 seed  
453 pools derived from EMS-treated sorghum seeds by single seed descent. Whole genome sequencing  
454 of a set of 256 lines uncovered 1.8 million canonical EMS-induced mutations <sup>34</sup>. We searched the  
455 sorghum ortholog of the barley *COM1* in the aforementioned sequence database to identify plants  
456 carrying mutation. To confirm the mutations, the amplified ORF was also re-sequenced by Sanger  
457 sequencing using primers listed in Supplementary Table 1.

## 458 **Haplotype and network analysis**

459 Genomic DNA from a core collection including 146 landrace and intermedium barley accessions  
460 as well as 90 wild barley (Supplementary Table 6) was PCR-amplified using specific primers to  
461 amplify full coding sequence of the barley *COM1* gene. Amplified fragments were used for direct  
462 PCR sequencing (Sanger method; BigDye Terminator v3.1 cycle sequencing kit; Applied  
463 Biosystems). A capillary-based ABI3730xl sequencing system (Applied Biosystems) at the  
464 sequencing facility of IPK was used to separate the fluorescently terminated extension products.  
465 Sequence assembly was performed using Sequencher 5.2.2.3. Visual inspection of sequence  
466 chromatograms was carried out using Sequencher to detect the corresponding SNPs. Network  
467 analysis of the nucleotide haplotypes was carried out using TCS v1.21 software  
468 (<http://darwin.uvigo.es/software/tcs.html>)<sup>38</sup>.

469

## 470 **RNA extraction, sequencing and data analysis**

471 **RNA Extraction;** For the RNA-seq study, immature spike tissues were collected from BW-  
472 NIL(*com1.a*) and WT progenitor Bowman and the donor cultivar Foma. Plants were grown  
473 under phytochamber conditions of 12h light (12 °C) and 12h dark (8 °C). Tissues were always  
474 collected at the same time slot (14:00 to 17:00) during the day at three different developmental  
475 stages including TM and GP, and pooled stages of LP+SP. Three biological replicated were  
476 applied that resulted in 27 individual tissue samples. The TRIzol method (Invitrogen) was applied  
477 to extract total RNA from immature spike tissues followed by removal of genomic DNA  
478 contamination using RNase-free DNase (Invitrogen). RNA integrity and quantities were analyzed  
479 via Agilent 2100 Bioanalyzer (Agilent Technologies) and Qubit (Invitrogen), respectively.

480 **Preparation and sequencing of mRNA-Seq libraries:** SENSE mRNA-Seq libraries (27 = 3  
481 reps/3 stages /3 genotype) were prepared from 2 µg total RNA according to the protocol provided  
482 by the manufacturer (Lexogen GmbH, Vienna, Austria). Libraries were pooled in an equimolar  
483 manner and analysed electrophoretically using the Agilent 4200 TapeStation System (Agilent  
484 Technologies, Inc., Santa Clara, CA, USA). Quantification of libraries and sequencing (rapid run,  
485 paired-end sequencing, 2 x 100 cycles, on-board clustering) using the Illumina HiSeq2500 device  
486 (Illumina, San Diego, California, USA) were as described previously <sup>39</sup>.

487

#### 488 **Analysis of the RNAseq data:**

489 The reads from all three biological replicates were pooled per stage and each pool was  
490 independently mapped to barley pseudomolecules <sup>36</sup>,  
491 (160404\_barley\_pseudomolecules\_masked.fasta) using TopHAT2 <sup>40</sup>. Gene expression was  
492 estimated as read counts for each gene locus with the help of featureCounts <sup>41</sup> using the gene  
493 annotation file Hv\_IBSC\_PGSB\_r1\_HighConf.gtf and fragment per million (FPM) values were  
494 extracted from the BWA-aligned reads using Salmon <sup>42</sup>. Genes that showed FPM of 0 across all 45  
495 samples were excluded from expression levels calculations. Expression levels were normalized by  
496 TMM method and *p*-values were calculated by an exact negative binomial test along with the gene-  
497 specific variations estimated by empirical Bayes method in edgeR <sup>43</sup>. The Benjamini-Hochberg  
498 method was applied on the *p*-values to calculate *q*-values and to control the false discovery rate  
499 (FDR). Differentially expressed genes (DEGs) were defined as *q*-value < 0.05, log<sub>2</sub> fold change >  
500 1 or < -1.

#### 501 ***Quantitative RT-PCR***

502 Tissue sampling, RNA extraction, qualification and quantification was performed as described  
503 above. Reverse transcription and cDNA synthesis were carried out using SuperScript III Reverse  
504 Transcriptase kit (Invitrogen). Real-time PCR was performed using QuantiTect SYBR green PCR  
505 kit (Qiagen) and the ABI prism 7900HT sequence detection system (Applied Biosystems). Each  
506 qRT-PCR comprised at least four technical replicates, and each sample was represented by three  
507 biological replicates. The *Actin* gene based primers (**Supplementary Table 1**) were used as the  
508 reference sequence. qRT-PCR results were analyzed using SDS2.2 tool (Applied Biosystems) in  
509 which the presence of a unique PCR product was verified by dissociation analysis. Significance  
510 values were calculated using Student's *t*-test (two-tailed). The relevant primer sequences per  
511 species are detailed in **Supplementary Table 1**.

512

### 513 **Phylogenetic analysis**

514 A comprehensive analysis of TCP proteins in grasses was already available we therefore focused  
515 only on constructing a detailed phylogeny of the COM1 protein among grasses and the barley TCP  
516 genes. Thus, barley COM1 was then queried against Ensembl Plants database to retrieve its  
517 orthologs or homologs from other grasses. The same database was also used to extract all barley  
518 TCP proteins. In case of COM1, protein and DNA sequence of the first and the second best hit  
519 (FBHs and SBHs) to each of the grass species were retrieved. To re-check their homology with  
520 barley COM1, the retrieved sequences were blasted back against the barley genome. For  
521 phylogenetic analysis, protein sequences were initially aligned using the algorithm implemented in  
522 CLC sequence viewer V7.8.1 (<https://www.qiagenbioinformatics.com> ). UPGMA tree construction  
523 method and the distance measure of Jukes-Cantor were implemented for constructing the

524 phylogenetic tree using CLC sequence viewer. The bootstrap consensus tree inferred from 1000  
525 replicates was taken to represent the evolutionary relationship of the sequences analyzed.

### 526 *mRNA in situ hybridization*

527 Three separated segments (excluding the TCP domain) from the *COM1* gene each containing 300-  
528 360 bp were synthesized (probe 1 and 2, GenScript Biotech, Netherlands) or amplified (probe 3)  
529 using cDNAs isolated from immature spikes of cv. Bonus and specific primers (Supplementary  
530 Table 1). The resulting products were cloned into pBluescript II KS (+) vector (Stratagene, La  
531 Jolla, CA, USA and GenScript Biotech, Netherlands). Linearized clones by HindIII or NotI were  
532 used as templates to generate antisense (HindIII) and sense (NotI) probes using T3 or T7 RNA  
533 polymerase. *In situ* hybridization was conducted with a single pool of the three aforementioned  
534 probes as described previously<sup>44</sup>.

535

### 536 **Scanning electron microscopy**

537 Scanning electron microscopy (SEM) was performed on immature spike tissues at five stages  
538 including triple mound, glume, lemma, stamen, and awn primordium from greenhouse-grown  
539 plants. SEM was conducted as described elsewhere<sup>45</sup>.

540

### 541 **DNA preparation**

542 DNA was extracted from leaf samples at the seedling as described before<sup>12</sup>. Plants for which the  
543 DNA was prepared included barley, *Sorghum* and *Barchypodium*. That included either mapping  
544 population, TILLING mutants or both.



545 **Palea anatomical and transmission electron microscopy analyses.**

546 Plant material consisting of intact spikes shortly before anthesis was collected. Spikelets containing  
547 no grains were used for dissecting paleae that were subsequently stored in fixative (4% FA, 1%  
548 GA in 50 mM phosphate buffer). Central spikelets (in case of barley) were isolated and placed in  
549 a 15 ml test tube containing 10 ml fixative, followed by extensive degassing until all probes had  
550 settled. Material was stored in a fridge until use. After three washes with A.D., lemma and palea  
551 were isolated by cutting away a small part at the base of the spikelet. Isolated paleae were placed  
552 in a flat bottomed mould filled with 4% liquid agarose (~60°C). After setting, agarose blocks were  
553 removed from the mold and the encapsuled Palea was cut into 1-2mm wide sections using fresh  
554 razor blades. The embedding in agarose facilitated the cuttings while preventing unnecessary  
555 damage to the probes. After embedding in Spurr resin (see next page) semithin sections of 2 µm  
556 were cut on an Leica Ultracut. Sections were allowed to be baked in on a droplet of 0,02%  
557 Methylene blue/Azur blue on a heating plate set at 90°C. Recordings were made using a Keyence  
558 VHX-5000 digital microscope (Keyence Germany GmbH, Neu-Isenburg, Germany).

559

560 **Sequence information and analysis**

561 Unpublished sequence information for the BAC contigs 44150 spanning the interval between  
562 NGS084 and NGS094) was made available from the international barley sequencing consortium  
563 (through Nils Stein). This sequence information was used for marker development during high  
564 resolution mapping, map-based cloning and *COMI* gene identification. Later on, the initial contigs  
565 44150 sequence information was re- checked and confirmed with the higher-quality barley genome  
566 assembly and annotation data <sup>23</sup>.

567 **Whole genome shotgun sequencing of BW-NIL (*com1.a*)**

568 A whole-genome shotgun library was constructed using standard procedures (TruSeq DNA;  
569 Illumina) and quantified using real-time PCR. Cluster formation using the cBot device and paired-  
570 end sequencing (HiSeq2000, 2 x 101 cycles) were performed according to the manufacturer's  
571 instructions (Illumina).

572

573

574

575

576

577

578

579

580

581

582

583

584

585

586

587

588

589

## 590 **References**

- 591 1. Zhang, D.B. & Yuan, Z. Molecular Control of Grass Inflorescence Development. *Annual*  
592 *Review of Plant Biology, Vol 65* **65**, 553-78 (2014).  
593
- 594 2. Vegetti, A. & Anton, A.M. Some Evolution Trends in the Inflorescence of Poaceae. in  
595 *Flora* Vol. 190 225-228 (1995).  
596
- 597 3. Kellogg, E.A. *et al.* Early inflorescence development in the grasses (Poaceae). *Frontiers*  
598 *in Plant Science* **4** (2013).  
599
- 600 4. Endress, P.K. Disentangling confusions in inflorescence morphology: Patterns and  
601 diversity of reproductive shoot ramification in angiosperms. *Journal of Systematics*  
602 *and Evolution* **48**, 225-239 (2010).  
603
- 604 5. Remizowa, M.V., Rudall, P.J., Choob, V.V. & Sokoloff, D.D. Racemose inflorescences of  
605 monocots: structural and morphogenetic interaction at the flower/inflorescence  
606 level. *Annals of Botany* **112**, 1553-1566 (2013).  
607
- 608 6. Kellogg, E.A. Evolutionary history of the grasses. *Plant Physiology* **125**, 1198-1205  
609 (2001).  
610
- 611 7. Koppolu, R. & Schnurbusch, T. Developmental pathways for shaping spike  
612 inflorescence architecture in barley and wheat. *J Integr Plant Biol* **61**, 278-295 (2019).  
613
- 614 8. Lemmon, Z.H. *et al.* The evolution of inflorescence diversity in the nightshades and  
615 heterochrony during meristem maturation. *Genome Research* **26**, 1676-1686 (2016).  
616
- 617 9. Malcomber, S.T., Preston, J.C., Reinheimer, R., Kossuth, J. & Kellogg, E.A. Developmental  
618 gene evolution and the origin of grass inflorescence diversity. *Advances in Botanical*  
619 *Research: Incorporating Advances in Plant Pathology, Vol 44* **44**, 425-481 (2006).  
620
- 621 10. Vollbrecht, E., Springer, P.S., Goh, L., Buckler, E.S. & Martienssen, R. Architecture of  
622 floral branch systems in maize and related grasses. *Nature* **436**, 1119-1126 (2005).  
623
- 624 11. Druka, A. *et al.* Genetic dissection of barley morphology and development. *Plant*  
625 *Physiol* **155**, 617-27 (2011).  
626
- 627 12. Poursarebani, N. *et al.* The Genetic Basis of Composite Spike Form in Barley and  
628 'Miracle-Wheat'. *Genetics* **201**, 155-165 (2015).  
629
- 630 13. Cosgrove, D. Biophysical Control of Plant-Cell Growth. *Annual Review of Plant*  
631 *Physiology and Plant Molecular Biology* **37**, 377-405 (1986).  
632

- 633 14. Cosgrove, D.J. Plant cell wall extensibility: connecting plant cell growth with cell wall  
634 structure, mechanics, and the action of wall-modifying enzymes. *Journal of*  
635 *Experimental Botany* **67**, 463-476 (2016).
- 636 15. Martin-Trillo, M. & Cubas, P. TCP genes: a family snapshot ten years later. *Trends Plant*  
637 *Sci* **15**, 31-9 (2010).
- 638
- 639 16. Zhao, J. *et al.* Genome-Wide Identification and Expression Profiling of the TCP Family  
640 Genes in Spike and Grain Development of Wheat (*Triticum aestivum* L.). *Frontiers in*  
641 *Plant Science* **9** (2018).
- 642
- 643 17. Lewis, M.W. *et al.* Gene regulatory interactions at lateral organ boundaries in maize.  
644 *Development* **141**, 4590-4597 (2014).
- 645
- 646 18. Bai, F., Reinheimer, R., Durantini, D., Kellogg, E.A. & Schmidt, R.J. TCP transcription  
647 factor, BRANCH ANGLE DEFECTIVE 1 (BAD1), is required for normal tassel branch  
648 angle formation in maize. *Proceedings of the National Academy of Sciences of the United*  
649 *States of America* **109**, 12225-12230 (2012).
- 650
- 651 19. Zeng, D.-D. *et al.* DBOP specifies palea development by suppressing the expansion of  
652 the margin of palea in rice. *Genes & Genomics* **38**, 1095-1103 (2016).
- 653
- 654 20. Yuan, Z. *et al.* RETARDED PALEA1 Controls Palea Development and Floral  
655 Zygomorphy in Rice. *Plant Physiology* **149**, 235-244 (2009).
- 656
- 657 21. Studer, R.A. & Robinson-Rechavi, M. How confident can we be that orthologs are  
658 similar, but paralogs differ? *Trends in Genetics* **25**, 210-216 (2009).
- 659
- 660 22. Jiao, Y.P. *et al.* MSD1 regulates pedicellate spikelet fertility in sorghum through the  
661 jasmonic acid pathway. *Nature Communications* **9** (2018).
- 662
- 663 23. Aguilar-Martinez, J.A., Poza-Carrion, C. & Cubas, P. Arabidopsis BRANCHED1 acts as  
664 an integrator of branching signals within axillary buds. *Plant Cell* **19**, 458-472 (2007).
- 665
- 666 24. Koppolu, R. *et al.* Six-rowed spike4 (*Vrs4*) controls spikelet determinacy and row-type  
667 in barley. *Proceedings of the National Academy of Sciences of the United States of*  
668 *America* **110**, 13198-13203 (2013).
- 669
- 670 25. Russell, J. *et al.* Exome sequencing of geographically diverse barley landraces and wild  
671 relatives gives insights into environmental adaptation. *Nature Genetics* **48**, 1024-1030  
672 (2016).
- 673
- 674 26. Liu, K. *et al.* Wheat TaSPL8 Modulates Leaf Angle Through Auxin and Brassinosteroid  
675 Signaling. *Plant Physiology* **181**, 179-194 (2019).
- 676

- 677 27. Van der Does, D. *et al.* The Arabidopsis leucine-rich repeat receptor kinase MIK2/LRR-  
678 KISS connects cell wall integrity sensing, root growth and response to abiotic and  
679 biotic stresses. *Plos Genetics* **13** (2017).  
680
- 681 28. Gou, M.Y., Ran, X.Z., Martin, D.W. & Liu, C.J. The scaffold proteins of lignin biosynthetic  
682 cytochrome P450 enzymes. *Nature Plants* **4**, 299-310 (2018).  
683
- 684 29. Chiba, Y., Mitani, N., Yamaji, N. & Ma, J.F. HvLsi1 is a silicon influx transporter in barley.  
685 *Plant Journal* **57**, 810-818 (2009).  
686
- 687 30. Whipple, C.J. Grass inflorescence architecture and evolution: the origin of novel  
688 signaling centers. *New Phytol* **216**, 367-372 (2017).  
689
- 690 31. Hara, Y., Yokoyama, R., Osakabe, K., Toki, S. & Nishitani, K. Function of xyloglucan  
691 endotransglucosylase/hydrolases in rice. *Annals of Botany* **114**, 1309-1318 (2014).  
692
- 693 32. Landrein, B. & Ingram, G. Connected through the force: mechanical signals in plant  
694 development. *Journal of Experimental Botany* **70**, 3507-3519 (2019).  
695
- 696 33. Manassero, N.G., Viola, I.L., Welchen, E. & Gonzalez, D.H. TCP transcription factors:  
697 architectures of plant form. *Biomol Concepts* **4**, 111-27 (2013).  
698
- 699 34. Dalmais, M. *et al.* A TILLING Platform for Functional Genomics in Brachypodium  
700 distachyon. *PLoS One* **8**, e65503 (2013).  
701
- 702 35. Jiao, Y.P. *et al.* A Sorghum Mutant Resource as an Efficient Platform for Gene Discovery  
703 in Grasses. *Plant Cell* **28**, 1551-1562 (2016).  
704
- 705 36. Mascher, M. *et al.* A chromosome conformation capture ordered sequence of the  
706 barley genome. *Nature* **544**, 427 (2017).  
707
- 708 37. Gottwald, S., Bauer, P., Komatsuda, T., Lundqvist, U. & Stein, N. TILLING in the two-  
709 rowed barley cultivar 'Barke' reveals preferred sites of functional diversity in the gene  
710 HvHox1. *BMC Res Notes* **2**, 258 (2009).  
711
- 712 38. Clement, M., Posada, D. & Crandall, K.A. TCS: a computer program to estimate gene  
713 genealogies. *Mol Ecol* **9**, 1657-9 (2000).  
714
- 715 39. Beier, S. *et al.* Construction of a map-based reference genome sequence for barley,  
716 *Hordeum vulgare* L. *Scientific Data* **4**, 170044 (2017).  
717
- 718 40. Kim, D. *et al.* TopHat2: accurate alignment of transcriptomes in the presence of  
719 insertions, deletions and gene fusions. *Genome Biology* **14**, R36 (2013).  
720
- 721 41. Liao, Y., Smyth, G.K. & Shi, W. featureCounts: an efficient general purpose program for  
722 assigning sequence reads to genomic features. *Bioinformatics* **30**, 923-930 (2014).

- 723  
724 42. Patro, R., Duggal, G., Love, M.I., Irizarry, R.A. & Kingsford, C. Salmon provides fast and  
725 bias-aware quantification of transcript expression. *Nature Methods* **14**, 417-419  
726 (2017).  
727  
728 43. Robinson, M.D., McCarthy, D.J. & Smyth, G.K. edgeR: a Bioconductor package for  
729 differential expression analysis of digital gene expression data. *Bioinformatics* **26**,  
730 139-140 (2010).  
731 44. Komatsuda, T. *et al.* Six-rowed barley originated from a mutation in a homeodomain-  
732 leucine zipper I-class homeobox gene. *Proceedings of the National Academy of Sciences*  
733 *of the United States of America* **104**, 1424-1429 (2007).  
734  
735 45. Lolas, I.B. *et al.* The transcript elongation factor FACT affects Arabidopsis vegetative  
736 and reproductive development and genetically interacts with HUB1/2. *Plant J* **61**, 686-  
737 97 (2010).

738  
739 **Acknowledgments:** We thank the US Department of Agriculture–Agricultural Research Service  
740 (USDA-ARS), the National Small Grains Collection, Aberdeen (ID); the Nordic Genetic Resources  
741 Center (NordGen), Alnarp, Sweden; and the IPK Genebank, Germany, for providing the mutants  
742 and germplasm for haplotype analysis. The authors would like to thank Dr. Shun Sakuma for  
743 fruitful discussions and help in conducting mRNA *in-situ* hybridizations. We are thankful to Dr.  
744 Marion Dalmais, INRA Evry, France, for providing access to and screening of the *Brachypodium*  
745 *distachyon* TILLING resource, Anne Fiebig for help with data submission to ENA and Sandra  
746 Driesslein, Jenny Knibbiche, Mechthild Pürschel, Ines Walde, Kerstin Wolf, Marion Benecke and  
747 Kirsten Hoffie for excellent technical assistance.

748  
749 **Funding:** During this study, research in the Schnurbusch laboratory received financial support  
750 from the Federal Ministry of Education and Research (BMBF) FKZ 0315954A and 031B0201A,  
751 HEISENBERG Program of the German Research Foundation (DFG), grant No. SCHN 768/8-1  
752 and SCHN 768/15-1, as well as IPK core budget.

753

754 **Author contributions:** T.S. conceived the idea for the study, designed and monitored experiments,  
755 and analyzed data. N.P. expanded the idea for the study, designed and performed experiments and  
756 analyzed data; C.T. executed the mRNA *in-situ* hybridizations. M.M. conducted microscopic  
757 analyses of cellular structures in paleae. T.N. analyzed RNA-seq data. U.L. provided irregular and  
758 intermedium barley spike mutants. T.R. executed SEM analyses. T.Schm. conducted sequence read  
759 mapping to unpublished barley genomic sequences for SNP calling. R.B., A.H. and L.A. performed  
760 the initial whole-genome shotgun sequencing of the parental genotypes for mapping. R.K. was  
761 involved in the phenotypic analysis of *com1.a* and RT-qPCR analyses of *COM1* in barley *vrs4*  
762 mutant. H.M.Y. provided sequences from a barley diversity panel for haplotype analysis and was  
763 involved in the RT-qPCR analysis. M.D. and A.B. provided the *Brachypodium* TILLING resource;  
764 N.S. provided the barley TILLING resource; Z.X. provided the sorghum TILLING resource. N.P.  
765 and T.S. wrote the manuscript including contributions from co-authors. All authors have seen and  
766 agreed upon the final version of the manuscript.

767

768 **Competing interests:**

769 The authors declare no conflict of interest.

770

771 **Data and materials availability:**

772 Barley mutants are available from TS under a material transfer agreement (MTA) with IPK-  
773 Gatersleben. All data are available in the main text or online materials. The RNA-seq data and the  
774 whole genome shotgun (WGS) sequences of *com1.a* mutant have been submitted to the European

775 Nucleotide Archive under accession number PRJEB35746 and PRJEB35761, respectively. COM1  
776 sequences are available with the corresponding ID mentioned in the current study in the public  
777 databases <https://plants.ensembl.org/> & <https://apex.ipk-gatersleben.de/apex/f?p=284:10> and are in  
778 the process of submission to NCBI as well.

779

## 780 **Figure Legends:**

### 781 **Main Figures**

782 **Fig. 1 Proposed evolutionary pattern of grass inflorescences, and the spike/palea morphology**  
783 **of wild-type and *com1.a* mutant barley. (A–D)** Model for grass inflorescence evolution from  
784 ancestral compound form to spike in *Triticeae*; re-drawn from <sup>2</sup>. **(E)** Spike morphology of wild-  
785 type (Wt) barley *cv.* Bowman. **(F–G)** Branched (mutant) BW-NIL(*com1.a*). **(H–I)** Floral reversion  
786 of spikelet to small spike-like branch structure from severe **(H)** to weak appearance as an extended  
787 rachilla **(I)**. **(J–M)** Consecutive developmental stages of immature BW-NIL(*com1.a*) mutant spike  
788 from early glume primordium **(J)**, advanced glume primordium **(K)**, to advanced lemma **(L)** and  
789 early stamen primordium **(M)**. **(N)** Dorsal view of immature BW-NIL(*com1.a*) mutant spike at  
790 early stamen primordia. **(O)** Longitudinal adaxial palea view of the BW-NIL(*com1.a*); white  
791 rectangle corresponds to the area used to take sections for histological analysis and to the lower  
792 image depicting the flat-plane surface of a cross section. **(P)** Longitudinal adaxial view of Wt palea;  
793 the lower image corresponds to the infolding surface of a cross section. **(Q–R)** Histological  
794 analyses of transverse sections (from O and P; white rectangles) of palea in mutant **(Q)** and Wt  
795 **(R)**. Paleae are from spikelets shortly before anthesis. **(S–Z)** Walls of palea cells in mutant **(S–V)**  
796 versus Wt **(W–Z)**.



797

798 **Fig. 2 Map-based cloning of the gene underlying *com1.a*, phylogenetic analysis and protein**  
799 **structural variation of COM1.** (A) Physical and genetic maps of *com1.a* from 100 recombinant  
800 plants or ~6,000 gametes. A single gene (red; HORVU5Hr1G061270, a single-exon TCP  
801 transcription factor) was the strongest candidate and deleted in the mutant parent BW-  
802 NIL(*com1.a*). (B) *COM1* gene model containing one TCP DNA binding domain. Six TILLING  
803 alleles are shown with prefix M3 (**Supplementary Note**). (C) UPGMA phylogenetic tree, using  
804 1000 bootstrap replications, of *COM1* first best (highlighted in gray) and second best homologs.  
805 (D) Evolutionarily conserved motifs among proteins present in the phylogenetic tree using  
806 SALAD. (see also **Supplementary Fig. 8**).

807

808 **Fig. 3 Inflorescence morphology and gene expression patterns in sorghum (A–F) and**  
809 ***Brachypodium* (G–R).** (A) Inflorescence shape in wild type (Wt) *cv.* BT623. (B). Compact  
810 inflorescence in TILLING mutant ARS180. (C) Expanded branch angle of Wt. (D) Acute branch  
811 angle in mutant ARS180. (E) Dissected dorsal view of the pulvinus (red circles). (F) RT-qPCR of  
812 *SbBad1/Wab1* in organs of Wt plants. 1\_1, 1\_2 and 1\_3 represent first, second and third branch  
813 meristem stages, respectively. (G) Mutant palea scissor-like structure collapses easily due to  
814 external mechanical pressure; (H) normal/solid palea structure in Wt plants. (I) Acute branch angle  
815 in mutant (J); expanded branch angle in Wt. (K) SEM view of transverse section of Wt palea;  
816 mutant has extra VB in middle (L) lacking in Wt (M). (N) RT-qPCR of *BdBad1/Wab1* gene  
817 expression in Wt. (O) Branch angle measurement, as proxy for pulvinus size, among contrasting  
818 M6 homozygous TILLING lines; aa and bb refer to mutant and Wt homozygous, respectively  
819 (**Supplementary Note**). Values above x-axis indicate number of angles measured. (P–Q) were

820 used for measuring number of spikelets per individual inflorescence (panicle) (**P**) and number of  
821 florets per spikelet (**Q**) in the same M6 TILLING plant material (illustrated in **O**); mutants (gray  
822 boxes) showed no significant difference to Wt. P values were determined using *Student's t* test.  
823 Values above x-axis indicate number of plants. Genotype IDs below x-axis refer to the parental  
824 line of the respective M6 family.

825  
826 **Fig. 4. Transcript analyses of *COMI* in two-rowed barley.** (A) Relative *COMI* expression at  
827 different stages of immature spike and (B) organs along with spike sections (basal, central and  
828 apical at AP) of *cv.* Bowman.. Despite expression in tiller buds, no difference in tiller number was  
829 observed (**Supplementary Note, Supplementary Fig. 5**). y-axis value: expression relative to  
830 *HvActin*. (C) Semi-qPCR of *COMI* mRNA. (D) Control hybridization using sense probe. (E–G)  
831 mRNA in-situ hybridization of *COMI* in two-rowed Wt barley *cv.* Bonus. Tissues represent cross-  
832 section through a spikelet triplet at TM (E) and AP stages (F–G).

833  
834 **Fig. 5. Model of *COMI* regulation based on transcriptome analysis in barley (A–B) and**  
835 **schematic representation of *COMI* functional modification from non-*Triticeae* (C–D).** Wt  
836 *COMI* transcriptional regulation model based on downregulation of the Wt allele. (B) RNA-seq-  
837 based heat map of selected differentially expressed (DE) genes; for the remaining DE genes see  
838 **Supplementary Fig. 11.** (C–D) IM-to-BM boundary formation due to Wt gene function (C) and  
839 lack of boundary due to the loss-of-function allele (D) in non-*Triticeae* grasses. Of note, *COMI*  
840 involvement in thickening the boundary cell walls within non-*Triticeae* species cannot be excluded.  
841 (E) IM-to-SM boundary formation in Wt barley; restriction of *COMI* function to cell wall  
842 thickening (the blue program), due to the evolutionary functional modification. (F). SM-to-IM

843 floral reversion observed in barley *com1.a* due to lack of the corresponding wall-amplified  
844 micromechanical signals needed to confer SM identity.

845

Table 1. Functional variation of *COM1* homologs observed among grass species

| Species             | Gene function in boundary | Effect on the corresponding organ/meristem |                            |                         |                                    |                               |
|---------------------|---------------------------|--------------------------------------------|----------------------------|-------------------------|------------------------------------|-------------------------------|
|                     |                           | On branch formation                        | On pulvinus size/formation | Growth of palea cells   | Number of VB <sup>1</sup> in palea | Pollen fertility <sup>2</sup> |
| Barley              | signaling                 | Inhibition                                 | - <sup>3</sup>             | Inhibition <sup>4</sup> | Promotion                          | Normal                        |
| <i>Brachypodium</i> | formation <sup>5</sup>    | No effect                                  | Promotion                  | No effect <sup>6</sup>  | Promotion                          | Normal                        |
| Rice                | formation                 | Not known <sup>7</sup>                     | Promotion                  | Promotion               | Promotion                          | Reduced                       |
| Sorghum             | formation                 | Promotion                                  | Promotion                  | No effect               | Promotion                          | Reduced                       |
| Maize               | formation                 | Promotion                                  | Promotion                  | No effect               | Not known                          | Not known                     |

1 stands for Vasculature Bundles

2 revealed by grain setting measurements as a proxy

3 pulvinus is typically absent in Wt spike of *Triticeae* including barley as well as in the branched mutant spikes.

4 apparent at the longitudinally-middle palea part resulting in formation of the infloded area

5 Refers to the formation of boundary between pulvinus and the lateral branch without which fusion of the two happened. Reflects intermediate evolutionary phylogenetic position of *Brachypodium* among grasses.

6 not visible at the microscopic level

7 perhaps because the rice cultivars used in the corresponding studies (*cv. Nipponbare* and *cv. 9522*) are known to exhibit panicles with acute lateral branches.

846

847

848 Figure 1

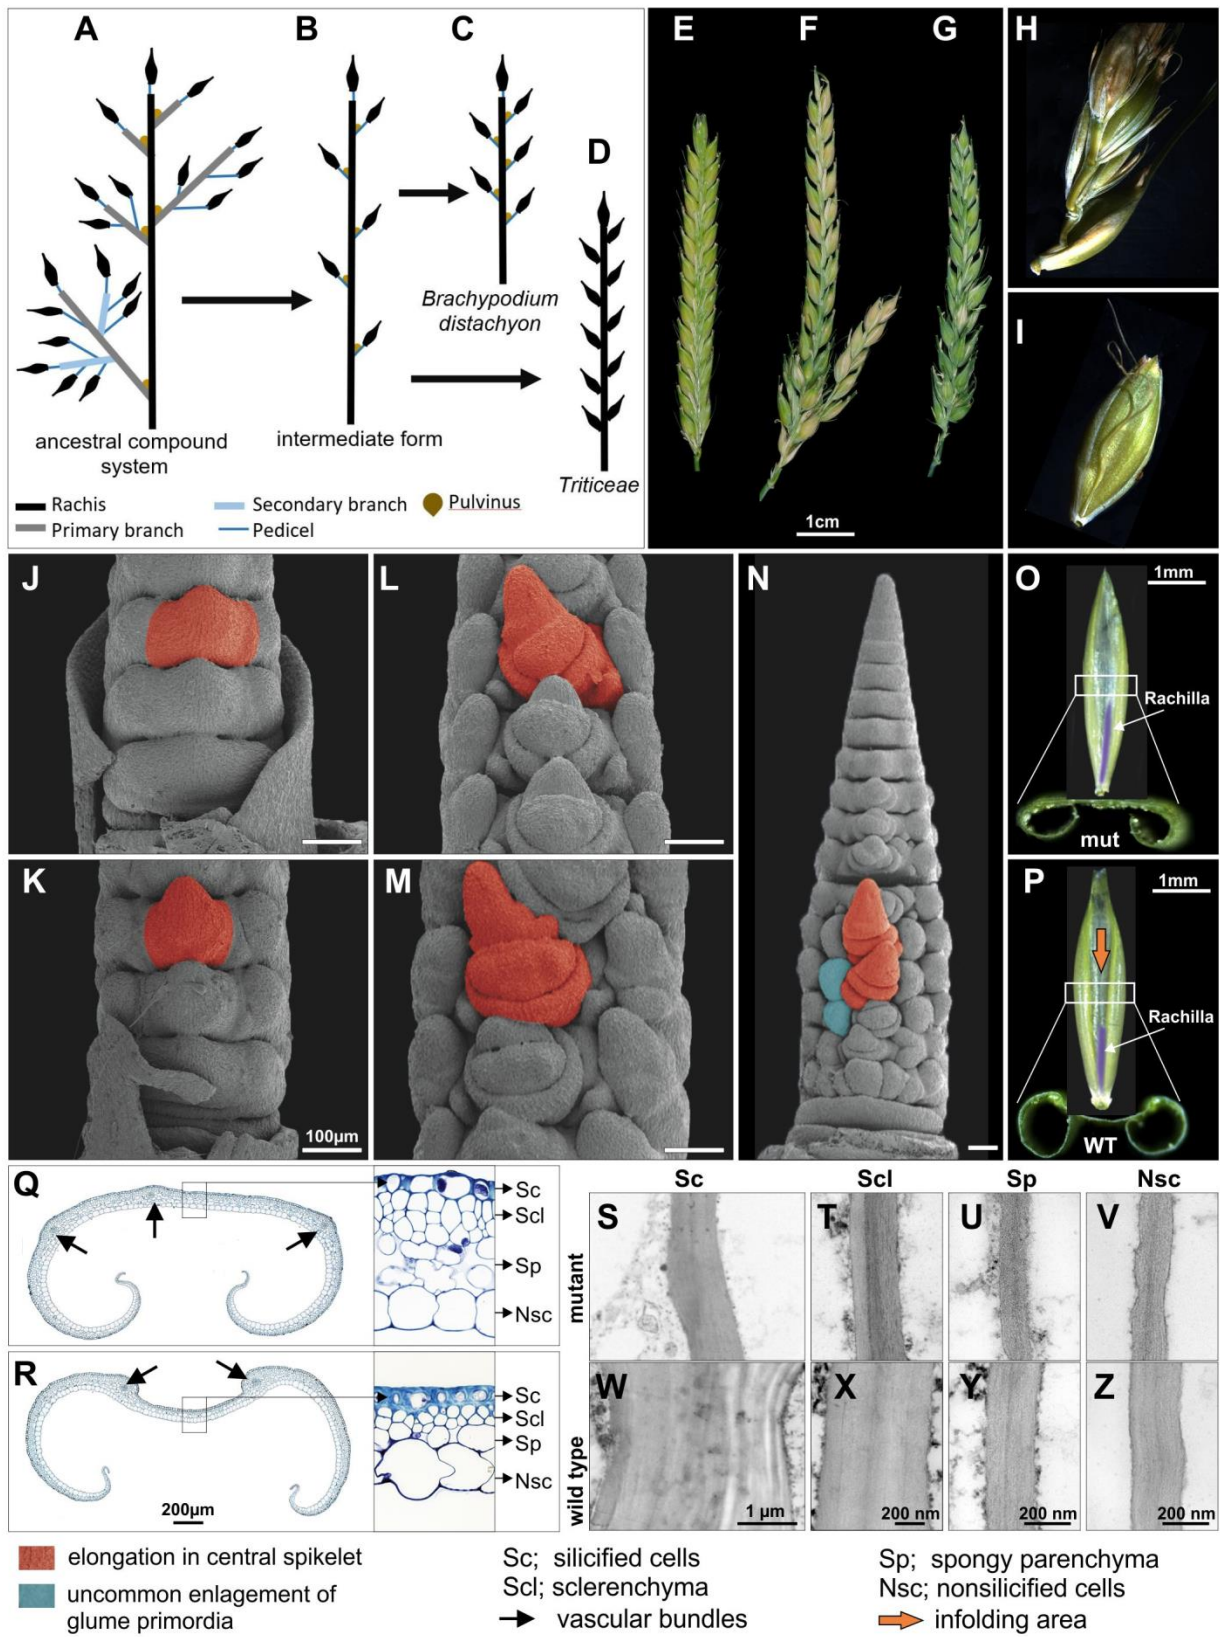

849

850 Figure 2

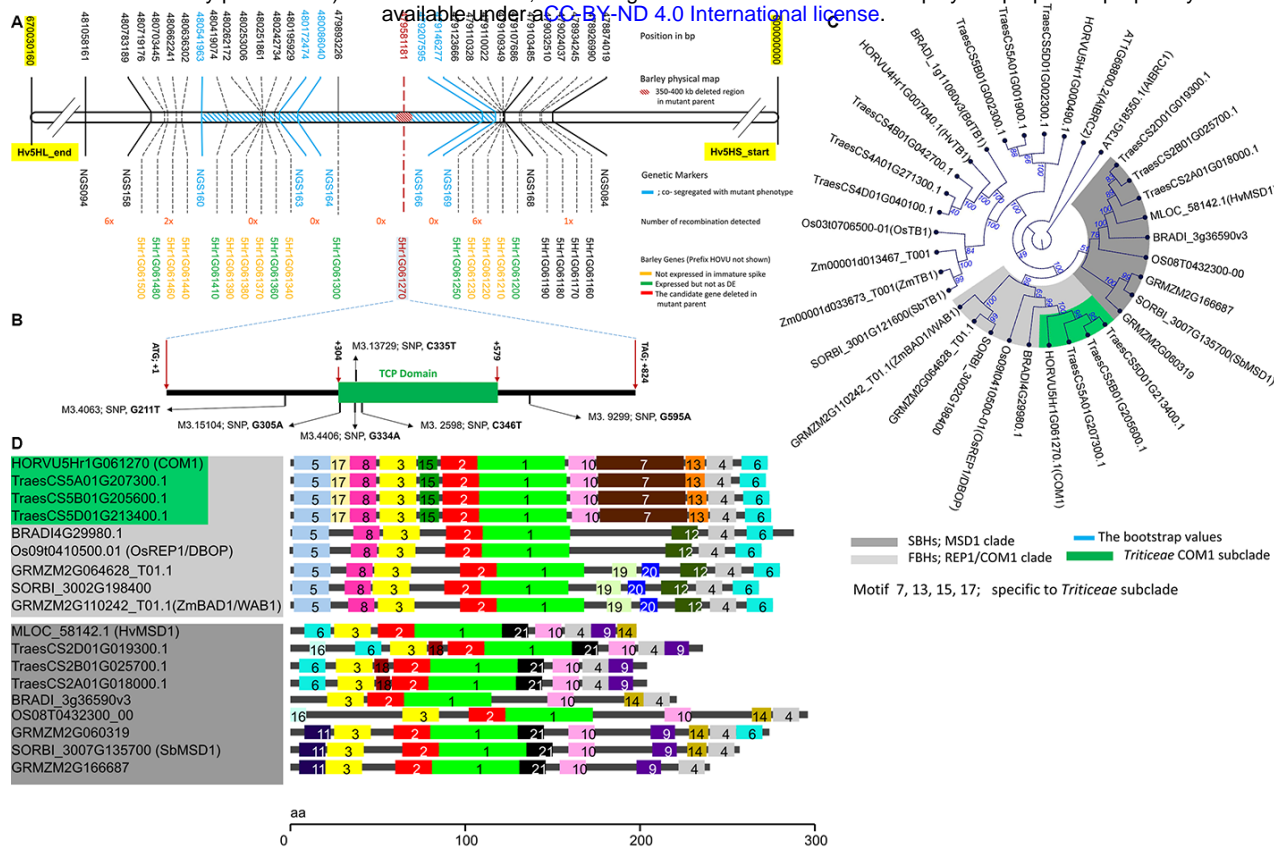

851

852

853 Figure 3

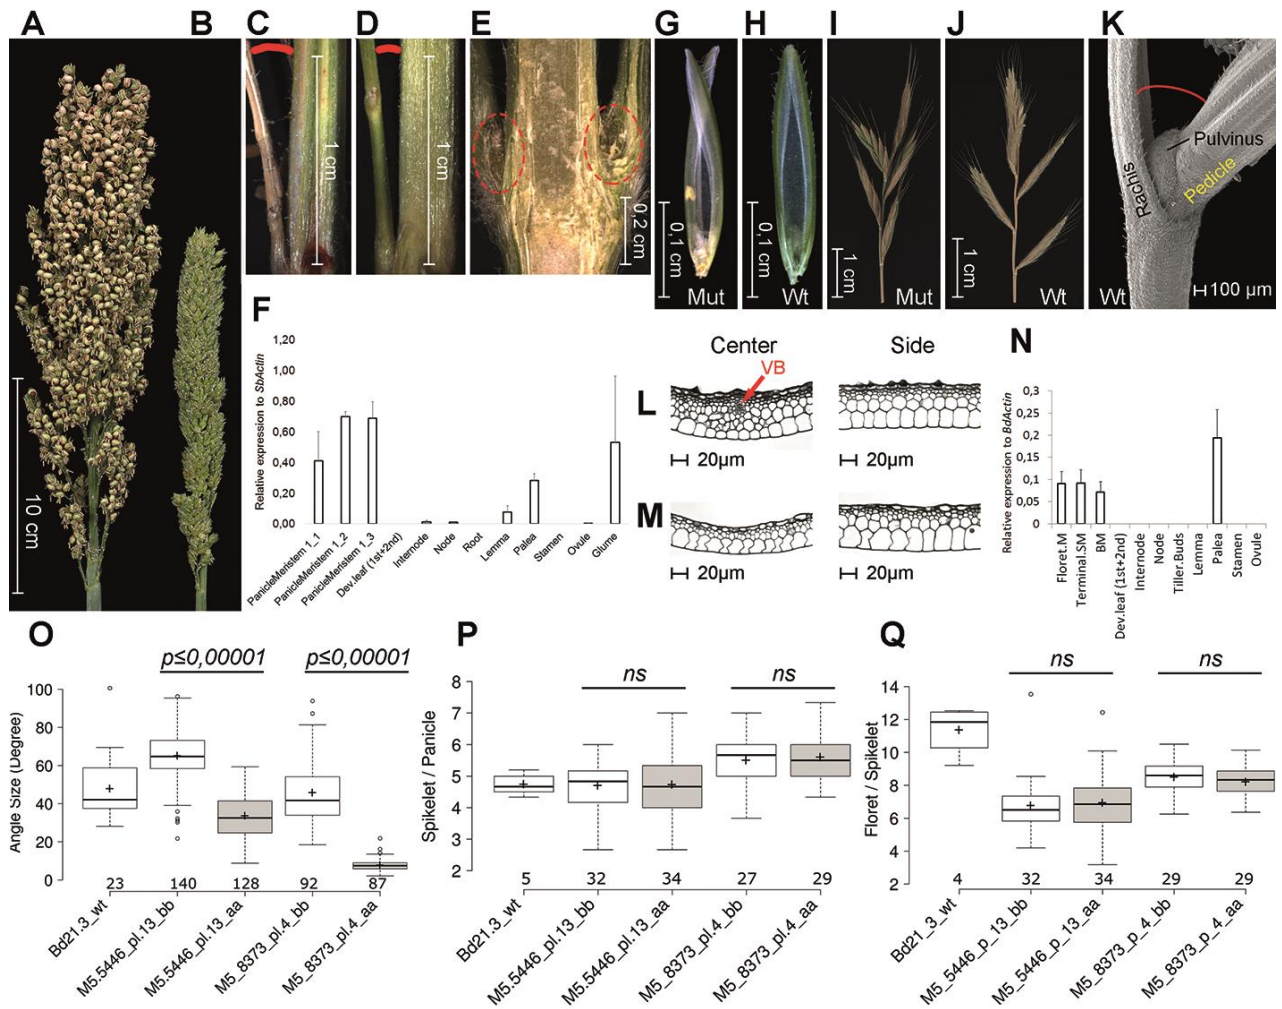

854

855

856 Figure 4  
857

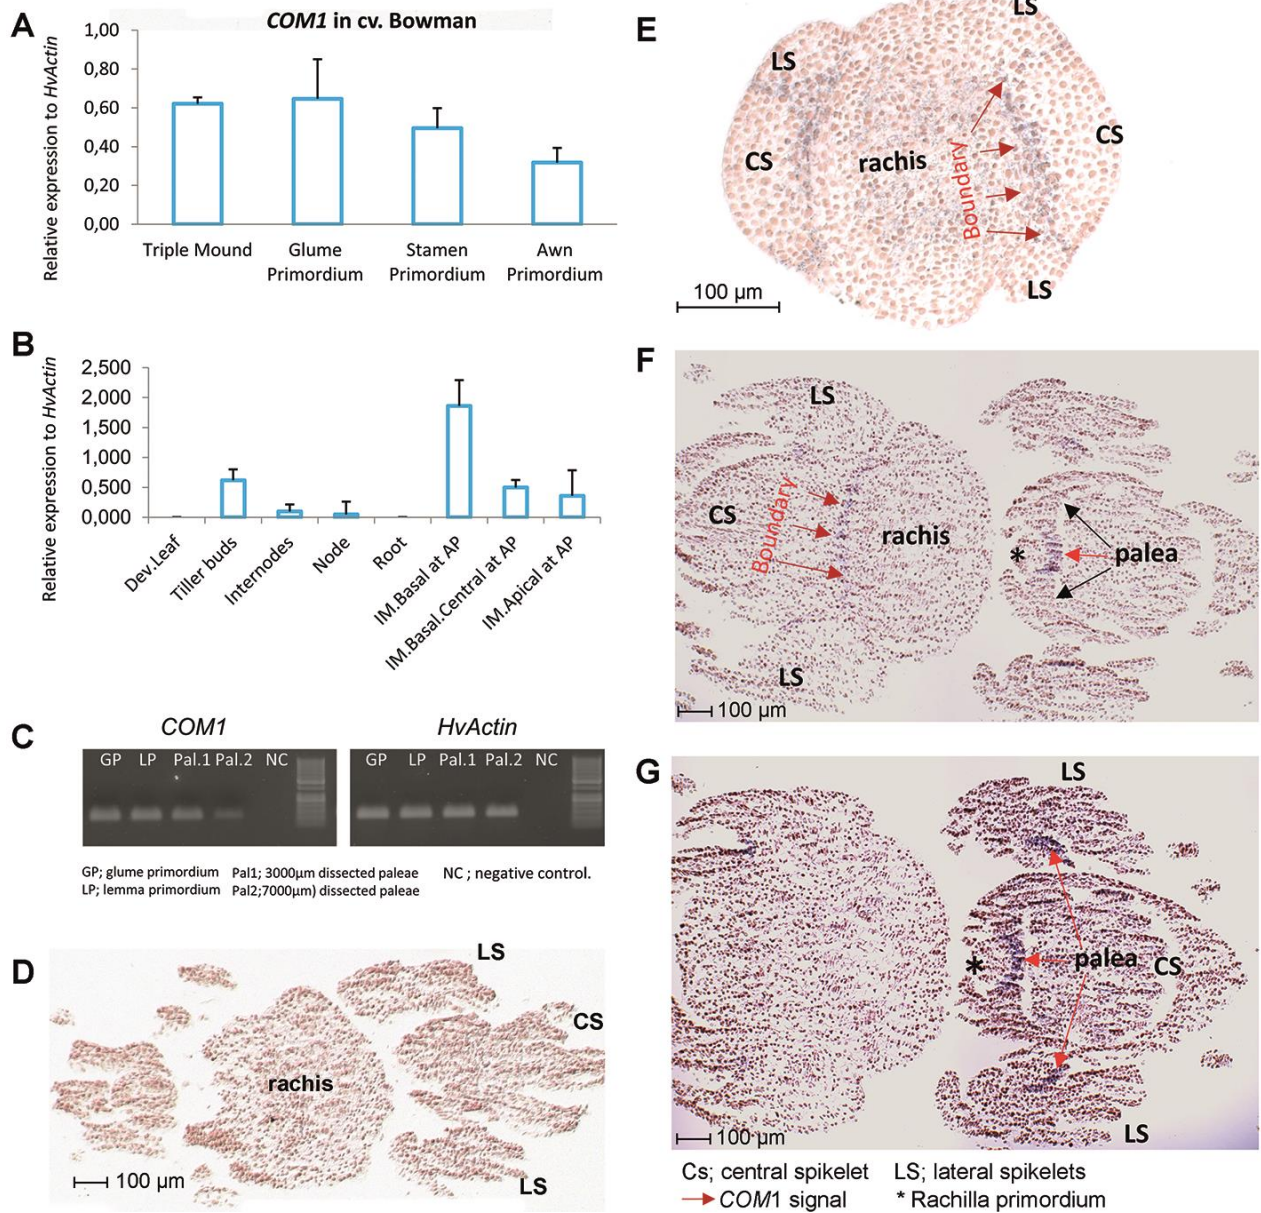

858

859



860 Figure 5

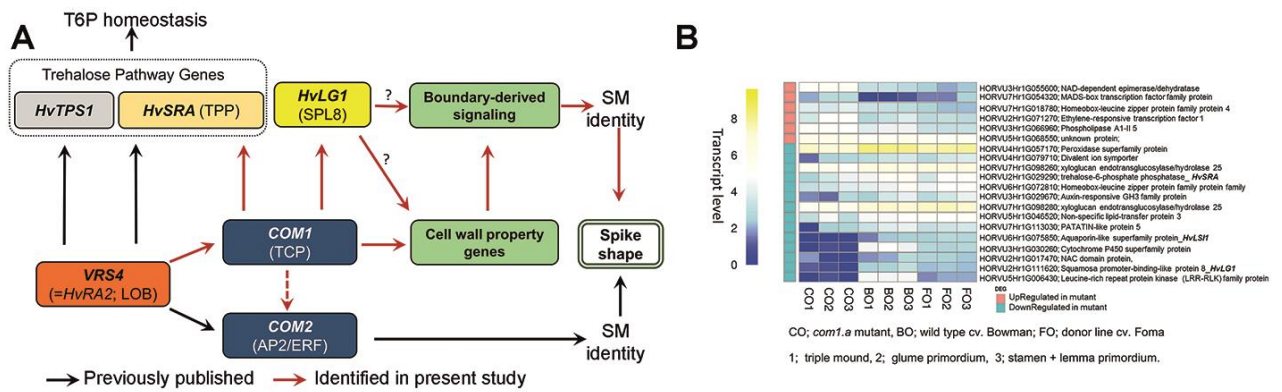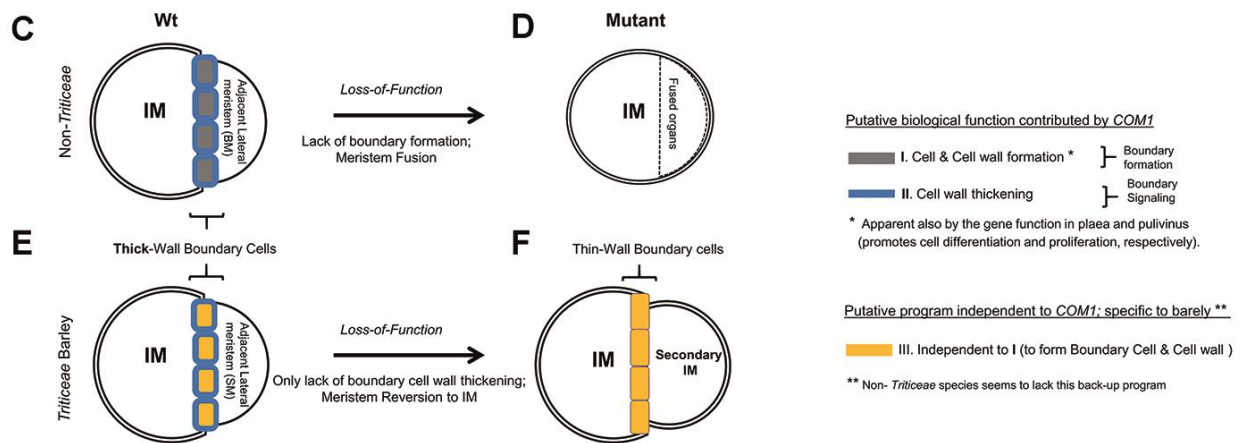

861

862

863

## Supplementary Information for

864

865 **Title:**

866 **COMPOSITUM 1 (COM1) contributes to the architectural simplification of barley**  
867 **inflorescence via cell wall-mediated and meristem identity signals**

868

869 **Authors:**

870 N. Poursarebani<sup>1</sup>, C. Trautewig<sup>1</sup>, M. Melzer<sup>1</sup>, T. Nussbaumer<sup>3,4</sup>, U. Lundqvist<sup>5</sup>, T. Rutten<sup>1</sup>, T.  
871 Schmutzer<sup>1,2</sup>, R. Brandt<sup>1</sup>, A. Himmelbach<sup>1</sup>, L. Altschmied<sup>1</sup>, R. Koppolu<sup>1</sup>, H. M. Youssef<sup>1,2,6</sup>,  
872 M. Dalmais<sup>7</sup>, A. Bendahmane<sup>7</sup>, N. Stein<sup>1</sup>, Z. Xin<sup>8</sup>, T. Schnurbusch<sup>1,2</sup>

873 \*Corresponding authors. Email: Poursarebani@ipk-gatersleben.de (NP); Schnurbusch@ipk-  
874 gatersleben.de (TS)

875

876 **This file includes:**

877 **Supplementary Notes**

878 **References**

879 **Supplementary Figs. 1 to 12**

880 **Supplementary Tables 1 to 6**

881 **Captions for Supplementary Source Data 1**

882

883

884 **Supplementary Notes**

885 ***COMI* positional cloning in barley**

886 The genetic map was conducted by screening ~6,000 gametes for recombination events in an  
887 F<sub>2</sub> population (Bowman x *com1.a*). After which, fifteen critical recombinant F<sub>2</sub>-derived F<sub>3</sub>  
888 families (i.e., 16 plants per family; **Supplementary Table 2- 3**) were further analyzed that  
889 unambiguously confirmed the genetic interval detected. Resequencing a set of 20 barley spike-  
890 branching mutants, using both CDS and promoter specific primer pairs (**Supplementary Table**  
891 **1 and S4**), revealed that five of them, i.e. *Mut.3906*, *int-h.42*, *int-h.43* and *int-h.44*, and *com1.i*,  
892 lost the same transcription factor as found missing in the *com1.a* mutant (**Supplementary Fig.**  
893 **3, Supplementary Table 1 and 4**). All five mutants also showed the flat-palea phenotype  
894 observed in the mutant *com1.a* (**Supplementary Fig. 3**). Allelism tests of *com1.a* with  
895 *Mut.3906* indicated that they are allelic to each other. Furthermore, we PCR-screened a barley  
896 TILLING populations from cv. Barke (two-rowed) for the CDS of the candidate gene. Four  
897 homozygous M3 plants (M3.15104, M3.4406, M3.13729 and M3. 2598) carrying SNP  
898 mutations inside the DNA binding domain as well as two heterozygous M3 lines M3.4063 and  
899 M3.9299 with SNP mutation outside the domain were identified (**Fig. 2B**). All six SNP  
900 mutations caused amino acid substitution in conserved positions (**Fig. 2B**). They all transmitted  
901 a branched spike as was revealed by the phenotypes of the corresponding M4 and M5  
902 homozygous plants (**Fig. 2B; Supplementary Fig. 4–5; Supplementary Table 4**).  
903 Interestingly, from the six TILLING mutants, only two, with mutation within the TCP domain,  
904 showed either a true flat-palea phenotype with a complete loss of the infolding (line 2598,  
905 exhibiting also the most severe branching), or only a mild change in the palea shape (line 4406)  
906 (**Supplementary Fig. 4**). Thus, penetrance of the mutant flat-palea phenotype depended on the  
907 type and position of the amino acids substitution (**Supplementary Fig. 4, legend**). Taken

908 together, these data indicate that the mutations in this transcription factor caused the two *com1*  
909 phenotypes.

910

### 911 **Development and characterized of BW-NIL (*com1.a com2.g*) double mutants**

912 20 BW-NIL(*com1.a com2.g*) double mutants homozygote plants along with 20 plants from each  
913 of the single mutants and 20 wild type cv. Bowman plants, were grown and used for  
914 phenotyping. The DM plants out-performed either single mutants in supernumerary spikelet  
915 and branch production and grain number per spike, which was elevated by ~50% in DMs as  
916 compared to single mutants alone (**Supplementary Fig. 6 and 12**, legend). Notably, all tillers  
917 from DMs showed both supernumerary spikelet formation and spike-branching phenotypes. In  
918 addition to the ramification observed in central SMs, SEM analysis of DM plants also showed  
919 floral reversion of the lateral SMs (**Supplementary Fig. 6**). Both events were highly penetrant  
920 and pronounced in the DM's immature spikes that led 100% of the plant tillers to exhibit a DM-  
921 specific enhanced spike-branching phenotype at maturity (**Supplementary Fig. 6 and 12**). The  
922 uncommon enlargement of the glum primordia (Blue asterisk in Fig. 1O) was seen only in ~5%  
923 of the tillers in single mutant *com1.a* whereas 100 % of the tillers in *com1.a com2.g* double  
924 mutants showed this enlargement (**Supplementary Fig. 12**).

925

### 926 **TILLING analysis of *BdCOM1* in *Brachypodium***

927 Our TILLING analysis in *Brachypodium distachyon* revealed several mutations in the *BdCOM1*  
928 homolog from which two (M4. 5446; Q116\* and M4. 8373; S146N) with predicted severe  
929 damages to the protein domain and function were phenotypically characterized  
930 (**Supplementary Table 4**). Hence, per M4 plants, only homozygous M5 plants either with  
931 mutant genotype aa (3 to 4 plants) or wild type bb (3 to 4 plants) were selected. Per M5 plants,  
932 10 M6 plants were grown. The homozygote states of the corresponding M5 and M6 mutant  
933 family transmitted a defect in palea structure (**Fig. 3**). In which, we always observed a palea

934 scissor-like structure in all florets in mutants, as it collapses easily due to external mechanical  
935 pressure. In contrast, palea in Wt never made such structure while applying same external hand-  
936 pressure. Histological analyses of the *Brachypodium* mutants' palea revealed no obvious  
937 change in cell expansion (**Fig. 4**).

938

## 939 **References**

- 940 1. Zhang, D.B. & Yuan, Z. Molecular Control of Grass Inflorescence Development. *Annual Review of Plant Biology*, Vol 65 **65**, 553-78 (2014).
- 941 2. Vegetti, A. & Anton, A.M. Some Evolution Trends in the Inflorescence of Poaceae. in *Flora* Vol. 190 225-228 (1995).
- 942 3. Kellogg, E.A. *et al.* Early inflorescence development in the grasses (Poaceae). *Frontiers in Plant Science* **4**(2013).
- 943 4. Endress, P.K. Disentangling confusions in inflorescence morphology: Patterns and diversity of reproductive shoot ramification in angiosperms. *Journal of Systematics and Evolution* **48**, 225-239 (2010).
- 944 5. Remizowa, M.V., Rudall, P.J., Choob, V.V. & Sokoloff, D.D. Racemose inflorescences of monocots: structural and morphogenetic interaction at the flower/inflorescence level. *Annals of Botany* **112**, 1553-1566 (2013).
- 945 6. Kellogg, E.A. Evolutionary history of the grasses. *Plant Physiology* **125**, 1198-1205 (2001).
- 946 7. Koppolu, R. & Schnurbusch, T. Developmental pathways for shaping spike inflorescence architecture in barley and wheat. *J Integr Plant Biol* **61**, 278-295 (2019).
- 947 8. Lemmon, Z.H. *et al.* The evolution of inflorescence diversity in the nightshades and heterochrony during meristem maturation. *Genome Research* **26**, 1676-1686 (2016).
- 948 9. Malcomber, S.T., Preston, J.C., Reinheimer, R., Kossuth, J. & Kellogg, E.A. Developmental gene evolution and the origin of grass inflorescence diversity. *Advances in Botanical Research: Incorporating Advances in Plant Pathology*, Vol 44 **44**, 425-481 (2006).
- 949 10. Vollbrecht, E., Springer, P.S., Goh, L., Buckler, E.S. & Martienssen, R. Architecture of floral branch systems in maize and related grasses. *Nature* **436**, 1119-1126 (2005).
- 950 11. Druka, A. *et al.* Genetic dissection of barley morphology and development. *Plant Physiol* **155**, 617-27 (2011).
- 951 12. Poursarebani, N. *et al.* The genetic basis of composite spike form in barley and 'Miracle-Wheat'. *Genetics* **201**, 155-165 (2015).
- 952 13. Cosgrove, D. Biophysical Control of Plant-Cell Growth. *Annual Review of Plant Physiology and Plant Molecular Biology* **37**, 377-405 (1986).
- 953 14. Cosgrove, D.J. Plant cell wall extensibility: connecting plant cell growth with cell wall structure, mechanics, and the action of wall-modifying enzymes. *Journal of Experimental Botany* **67**, 463-476 (2016).
- 954 15. Martin-Trillo, M. & Cubas, P. TCP genes: a family snapshot ten years later. *Trends Plant Sci* **15**, 31-9 (2010).

- 978 16. Zhao, J. *et al.* Genome-Wide Identification and Expression Profiling of the TCP  
979 Family Genes in Spike and Grain Development of Wheat (*Triticum aestivum* L.).  
980 *Frontiers in Plant Science* **9**(2018).
- 981 17. Lewis, M.W. *et al.* Gene regulatory interactions at lateral organ boundaries in  
982 maize. *Development* **141**, 4590-4597 (2014).
- 983 18. Bai, F., Reinheimer, R., Durantini, D., Kellogg, E.A. & Schmidt, R.J. TCP transcription  
984 factor, *BRANCH ANGLE DEFECTIVE 1 (BAD1)*, is required for normal tassel branch  
985 angle formation in maize. *Proceedings of the National Academy of Sciences of the*  
986 *United States of America* **109**, 12225-12230 (2012).
- 987 19. Zeng, D.-D. *et al.* DBOP specifies palea development by suppressing the expansion  
988 of the margin of palea in rice. *Genes & Genomics* **38**, 1095-1103 (2016).
- 989 20. Yuan, Z. *et al.* RETARDED PALEA1 Controls Palea Development and Floral  
990 Zygomorphy in Rice. *Plant Physiology* **149**, 235-244 (2009).
- 991 21. Studer, R.A. & Robinson-Rechavi, M. How confident can we be that orthologs are  
992 similar, but paralogs differ? *Trends in Genetics* **25**, 210-216 (2009).
- 993 22. Jiao, Y.P. *et al.* MSD1 regulates pedicellate spikelet fertility in sorghum through the  
994 jasmonic acid pathway. *Nature Communications* **9**(2018).
- 995 23. Aguilar-Martinez, J.A., Poza-Carrion, C. & Cubas, P. Arabidopsis BRANCHED1 acts  
996 as an integrator of branching signals within axillary buds. *Plant Cell* **19**, 458-472  
997 (2007).
- 998 24. Koppolu, R. *et al.* *Six-rowed spike4 (Vrs4)* controls spikelet determinacy and row-  
999 type in barley. *Proceedings of the National Academy of Sciences of the United States*  
1000 *of America* **110**, 13198-13203 (2013).
- 1001 25. Russell, J. *et al.* Exome sequencing of geographically diverse barley landraces and  
1002 wild relatives gives insights into environmental adaptation. *Nature Genetics* **48**,  
1003 1024-+ (2016).
- 1004 26. Liu, K. *et al.* Wheat *TaSPL8* Modulates Leaf Angle Through Auxin and  
1005 Brassinosteroid Signaling. *Plant Physiology* **181**, 179-194 (2019).
- 1006 27. Van der Does, D. *et al.* The Arabidopsis leucine-rich repeat receptor kinase  
1007 MIK2/LRR-KISS connects cell wall integrity sensing, root growth and response to  
1008 abiotic and biotic stresses. *Plos Genetics* **13**(2017).
- 1009 28. Gou, M.Y., Ran, X.Z., Martin, D.W. & Liu, C.J. The scaffold proteins of lignin  
1010 biosynthetic cytochrome P450 enzymes. *Nature Plants* **4**, 299-310 (2018).
- 1011 29. Chiba, Y., Mitani, N., Yamaji, N. & Ma, J.F. HvLsi1 is a silicon influx transporter in  
1012 barley. *Plant Journal* **57**, 810-818 (2009).
- 1013 30. Whipple, C.J. Grass inflorescence architecture and evolution: the origin of novel  
1014 signaling centers. *New Phytol* **216**, 367-372 (2017).
- 1015 31. Hara, Y., Yokoyama, R., Osakabe, K., Toki, S. & Nishitani, K. Function of xyloglucan  
1016 endotransglucosylase/hydrolases in rice. *Annals of Botany* **114**, 1309-1318  
1017 (2014).
- 1018 32. Landrein, B. & Ingram, G. Connected through the force: mechanical signals in plant  
1019 development. *Journal of Experimental Botany* **70**, 3507-3519 (2019).
- 1020 33. Manassero, N.G., Viola, I.L., Welchen, E. & Gonzalez, D.H. TCP transcription factors:  
1021 architectures of plant form. *Biomol Concepts* **4**, 111-27 (2013).
- 1022 34. Dalmais, M. *et al.* A TILLING Platform for Functional Genomics in Brachypodium  
1023 distachyon. *PLoS One* **8**, e65503 (2013).
- 1024 35. Jiao, Y.P. *et al.* A Sorghum Mutant Resource as an Efficient Platform for Gene  
1025 Discovery in Grasses. *Plant Cell* **28**, 1551-1562 (2016).
- 1026 36. Mascher, M. *et al.* A chromosome conformation capture ordered sequence of the  
1027 barley genome. *Nature* **544**, 427 (2017).

- 1028 37. Gottwald, S., Bauer, P., Komatsuda, T., Lundqvist, U. & Stein, N. TILLING in the two-  
1029 rowed barley cultivar 'Barke' reveals preferred sites of functional diversity in the  
1030 gene HvHox1. *BMC Res Notes* **2**, 258 (2009).
- 1031 38. Clement, M., Posada, D. & Crandall, K.A. TCS: a computer program to estimate gene  
1032 genealogies. *Mol Ecol* **9**, 1657-9 (2000).
- 1033 39. Beier, S. *et al.* Construction of a map-based reference genome sequence for barley,  
1034 *Hordeum vulgare* L. *Scientific Data* **4**, 170044 (2017).
- 1035 40. Kim, D. *et al.* TopHat2: accurate alignment of transcriptomes in the presence of  
1036 insertions, deletions and gene fusions. *Genome Biology* **14**, R36 (2013).
- 1037 41. Liao, Y., Smyth, G.K. & Shi, W. featureCounts: an efficient general purpose program  
1038 for assigning sequence reads to genomic features. *Bioinformatics* **30**, 923-930  
1039 (2014).
- 1040 42. Patro, R., Duggal, G., Love, M.I., Irizarry, R.A. & Kingsford, C. Salmon provides fast  
1041 and bias-aware quantification of transcript expression. *Nature Methods* **14**, 417-+  
1042 (2017).
- 1043 43. Robinson, M.D., McCarthy, D.J. & Smyth, G.K. edgeR: a Bioconductor package for  
1044 differential expression analysis of digital gene expression data. *Bioinformatics* **26**,  
1045 139-140 (2010).
- 1046 44. Komatsuda, T. *et al.* Six-rowed barley originated from a mutation in a  
1047 homeodomain-leucine zipper I-class homeobox gene. *Proceedings of the National*  
1048 *Academy of Sciences of the United States of America* **104**, 1424-1429 (2007).
- 1049 45. Lolas, I.B. *et al.* The transcript elongation factor FACT affects Arabidopsis  
1050 vegetative and reproductive development and genetically interacts with HUB1/2.  
1051 *Plant J* **61**, 686-97 (2010).
- 1052 46. Cao, Y.Y. *et al.* Identification of Differential Expression Genes in Leaves of Rice  
1053 (*Oryza sativa* L.) in Response to Heat Stress by cDNA-AFLP Analysis. *Biomed*  
1054 *Research International* (2013).
- 1055 47. Zhao, T. *et al.* Characterization and expression of 42 MADS-box genes in wheat  
1056 (*Triticum aestivum* L.). *Molecular Genetics and Genomics* **276**, 334-350 (2006).
- 1057 48. Masiero, S., Colombo, L., Grini, P.E., Schnittger, A. & Kater, M.M. The Emerging  
1058 Importance of Type I MADS Box Transcription Factors for Plant Reproduction.  
1059 *Plant Cell* **23**, 865-872 (2011).

1060

1061

1062

1063

1064

1065 **Supplementary figures**

1066 **Supplementary Figure 1. Creation of induced Bowman near isogenic line (NIL), mapping**  
1067 **population, marker resource and the low-resolution linkage map of *com1.a* in barley. (A**  
1068 **and B)** The *com1.a* phenotype was introduced (after its induction in barley cv. Foma) into a  
1069 two-rowed barley cv. Bowman by six time backcrosses as reported previously <sup>11</sup>. Green area in  
1070 chromosome 5H corresponds to the introgressed genomic segment carrying the underlying  
1071 *com1.a* mutation. (C) The resulted BW near isogenic line (NIL) of *com1.a* allele; BW-NIL  
1072 (*com1.a*) was crossed to cv. Bowman to generate F<sub>2</sub> population used in genetic mapping. (D)  
1073 BW-NIL (*com1.a*) was whole genome shotgun (WGS) sequenced to 10x coverage (Online  
1074 Materials) and compared with already published WGS of Bowman <sup>36</sup>. (E) Represents alignment  
1075 of the BW-NIL (*com1.a*) sequence assembly against the physically localized Bowman WGS  
1076 sequence contigs. The corresponding SNPs (that were used for marker development) derived  
1077 from the 5H introgression segment are plotted in the outer circle. (F) Genetic linkage mapping  
1078 of *com1.a* in barley, derived from the F<sub>2</sub> mapping population (see part C). SNPs derived from  
1079 E located within the introgressed region, were used for marker development. Markers in red  
1080 selected for high-resolution genetic mapping. A-B were performed and published previously <sup>11</sup>.  
1081 C-F are entirely performed in the present study, except WGS of the wild type cv. Bowman.

1082

1083 **Supplementary Figure 2: TEM based cell wall structure in wild type palea versus mutant**  
1084 ***com1.a*.**

1085 **Left-side;** cross section of wild type palea in which different cell positions (used to image the  
1086 cell walls shown in right panel) across cell layers (see Fig. 1S-T for the layer IDs) are labeled.  
1087 **Right-side;** Cell walls thickness in Wt is depicted compared with that of mutant for each  
1088 position of A-I; labeled accordingly in Left panel. BW-NIL (*com2.g*) mutant, that is visually



1089 similar in palea phenotype/structure with that of Wt cv. Bowman, were used here to compare  
1090 with the mutant *com1.a*.

1091

1092 **Supplementary Figure 3. Additional mutant alleles of spike branching in barley.** Different  
1093 *com1* induced mutant alleles identified by resequencing of primers correspond to CDS and  
1094 potential promotor region of *COM1*. The corresponding palea is shown in the upper –right side  
1095 of each spike image. See also **Supplementary Table 1** and 4.

1096

1097 **Supplementary Figure 4. Phenotype and COM1 protein sequence alignment in barley**  
1098 **TILLING lines.** (A) A representative display of branch formation of the six barley TILLING  
1099 mutant plants derived from barley cv. Barke. The corresponding palea is shown in the upper –  
1100 right side of each spike image. (B) Protein sequence alignment of the six mutants, some located  
1101 within the corresponding TCP domain (the red box). Mutation pointed with red arrows show  
1102 severe (dark red; M4.2598) and very mild (light red; M4.4406) palea phenotypes, while green  
1103 arrows show mutation with no palea phenotype.

1104

1105 **Supplementary Figure 5. Tillering related characters in barley TILLING lines.** (A)  
1106 Average tiller number and (B) spike number per plant of the three spike-branching barley  
1107 TILLING lines are compared against wild type cv. Barke. This was performed to check whether  
1108 *COM1* expression detected in tiller buds (**Fig. 4B**) play any role in tiller formation. Twenty  
1109 plants were grown per genotype under greenhouse conditions. *P* values were determined using  
1110 the Student's *t* test.

1111

1112 **Supplementary Figure 6. Immature spike and yield related components in double mutant**

1113 **BW-NIL (com1.a/com2.g) (DM).** (A) Lateral view of a DM immature spike at late GP stage.

1114 **(B-D)** Close-up and complete view of a DM immature spike; depict reversion of lateral and

1115 central SMs as well as glume primordium into the IM-like meristems. **(E-J)** Yield components

1116 of the DM plants, and the corresponding single mutants com1.a and com2.g in comparisons to

1117 the Wt cv. Bowman. Data are based on a single greenhouse-condition experiment and on

1118 averages of 20 plants (390 to 540 spikes) per phenotypic class.

1119

1120 **Supplementary Figure 7. Phylogeny of barley TCP proteins and the phylogeny-based**

1121 **model of COMI evolution.** (A) 1000 bootstraps based UPGMA phylogenetic tree of 22 barley

1122 TCP proteins. **(B).** Depicts origin and divergence of two (out-) paralogs of REP1/COM1 ( $\alpha$ )

1123 and MSD1 ( $\beta$ ; <sup>22</sup> clades from a common ancestor <sup>16</sup>. This divergence seems to happen after

1124 genome duplication in grass common ancestor and before the grass speciation (e.g. the

1125 separation of *Triticeae* from *Non-Triticeae* species). More importantly, in case of paralogs  $\alpha$

1126 clade; although the clade members showed no duplication (no in-paralogy) after speciation,

1127 except in maize (Fig. 2C; light-grey block), they have gone through a functional modification

1128 that separate *Non-Triticeae* function ( $\alpha$ 1) from that of *Triticeae* subclade ( $\alpha$ 2). Which,

1129 coincidentally, the respective modification separates inflorescence shapes between the two

1130 groups of grass plants by regulating contrasting phenotypes of formation versus inhibition of

1131 branches. Whether out-paralog  $\beta$  also differs in function among grass (to be as  $\beta$ 1 and  $\beta$ 2)

1132 remains to be investigated. So far, only functional characterization of  $\beta$  in sorghum, the *SbMsdl*,

1133 has been reported <sup>22</sup>. Lines in brown represent the speciation process.

1134

1135 **Supplementary Figure 8. Amino acid sequence alignment of the COM1 homologs among**

1136 **grass.** The green box shows the TCP domain conservation.

1137 **Supplementary Figure 9. Network analysis of COM1.** Depicts grouping of 237 barley  
1138 accessions (including 90 wild barleys) producing 12 haplotypes; comprising two main  
1139 haplotypes: namely Hap1 (154 wild and landraces) and Hap2 (64 wild and landraces) with Hap1  
1140 being assigned as ancestral. The remaining 10 haplotypes, except Hap8 that contains two  
1141 landraces comprised only wild barleys (16 accessions), independently raised from Hap1 during  
1142 the course of evolution. Accessions representing each of the 12 haplotypes were grown and  
1143 carefully inspected for the spike and palea phenotype for which no obvious phenotypic  
1144 alteration was observed. Sequences were obtained using primers for the CDS region.

1145

1146 **Supplementary Figure 10. Branch formation in *vrs4* mutant (*mull.a*).** (A) Mature spike of  
1147 wild type progenitor cv. Montcalm with determinate triple spikelet meristem. (B-D) Mature  
1148 spikes of *vrs4* mutant MC (*mull.a*) showing various levels of branch proliferation at the spike  
1149 base and middle portion of the spike. See also <sup>12</sup>. *COM1* (E) and *COM2* (F) transcripts in  
1150 BW-NIL(*vrs4.k*) (red) and *com1.a* (green) mutants, respectively. Mean  $\pm$ SE of three  
1151 biological replicates. *P* values were determined using the *Student's t* test.

1152

1153 **Supplementary Figure 11. Transcriptome analysis of *com1.a* using RNA seq.** Heat map of  
1154 all DE genes (found in RNA seq; n = 3 reps/3 stages /3 genotype) conjointly in the BW-NL  
1155 (*com2.g*) as compared to the corresponding wild type cv. Bowman and cv. Foma. The scale  
1156 bar at the top of the heat map indicates the transcript level of differentially regulated genes  
1157 observed between wild type and mutant; blue color indicates down-regulation while red shows  
1158 up-regulation. Of the highly upregulated genes in mutant *com1.a* was HORVU3Hr1G055600;  
1159 NAD-dependent epimerase/dehydratase gene family; associated with increased growth <sup>46</sup>.  
1160 Other highly upregulated genes involved in plant reproduction (HORVU7Hr1G054320; type I  
1161 MADS-box transcription factor family protein; <sup>47,48</sup>, as well as the floral meristem determinacy

1162 (HORVU7Hr1G018780; Homeobox-leucine zipper protein family protein 4; homology to  
 1163 HAT1 gene in *Arabidopsis thaliana*)<sup>3</sup>. Up regulation of these gene sets is fairly in line with the  
 1164 observed spike-branching phenotype of the mutant *com1.a*. See the main text; for illustration  
 1165 of the relevant genes that are downregulated in mutant.

1166

1167 **Supplementary Figure 12. The extended model of *COMI* regulations.** (A) Model of Wt  
 1168 *COMI* transcriptional regulation based on “down-regulation” of the Wt allele (B) The resulted  
 1169 spike phenotype (% of tiller per mutant plant) due to the respective gene(s) loss-of-function.  
 1170 Data are based on a single greenhouse-condition experiment and on averages of 20 plants (390  
 1171 to 540 spikes) per mutant class (*com1.a*, *com2.g* and the respective double mutants).

1172

1173 **Supplementary figures**

1174 **Supplementary Figure 1.**

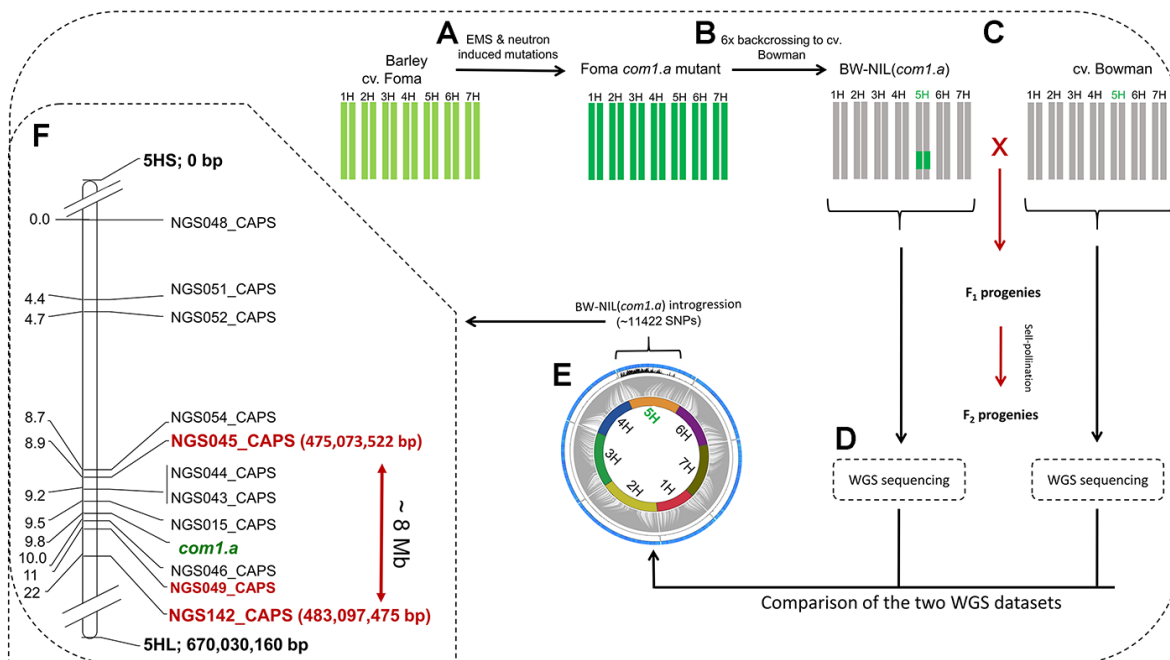

1175

1176

1177 **Supplementary Figure 2**

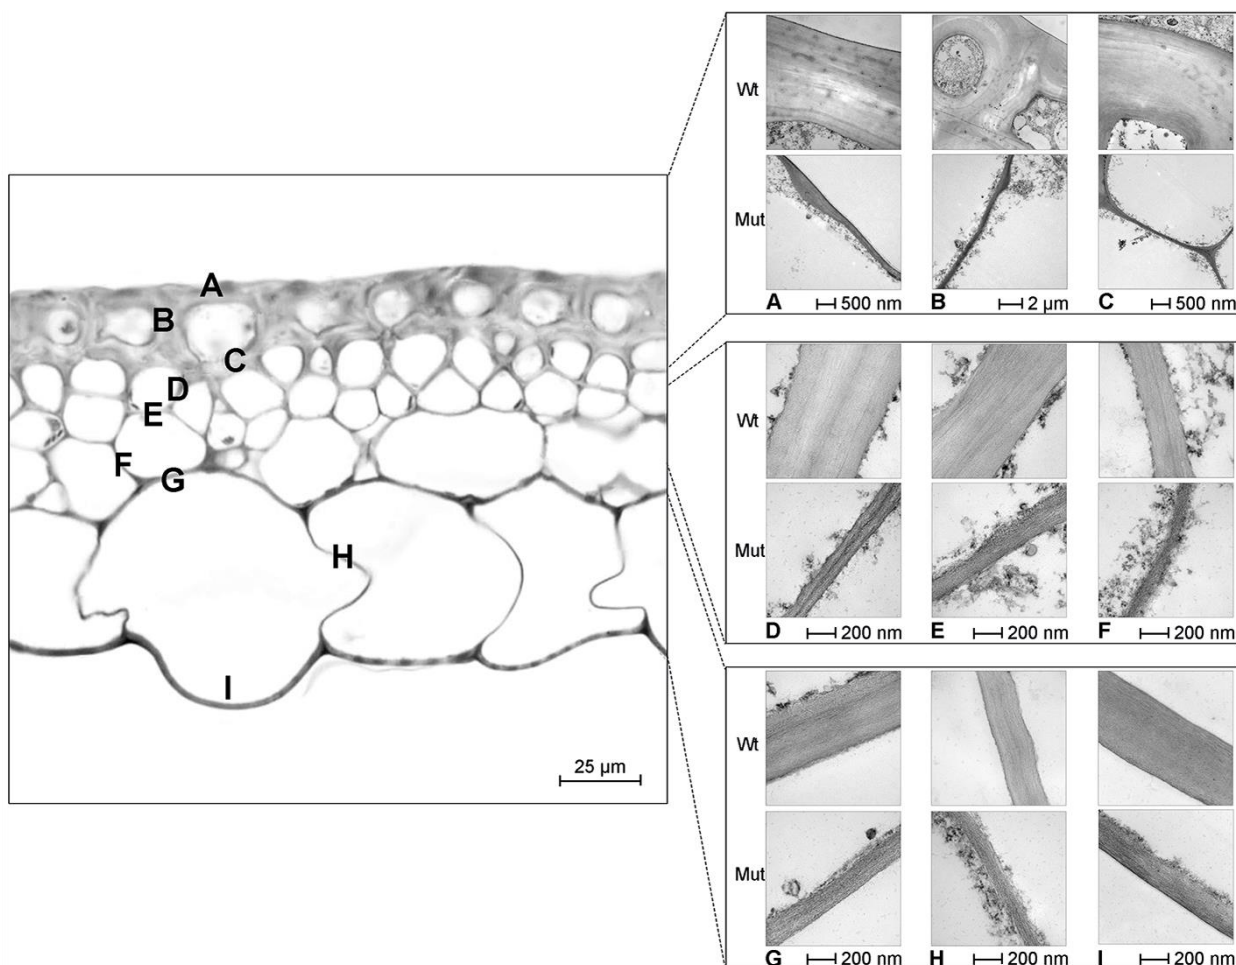

1178

1179 **Supplementary Figure 3**

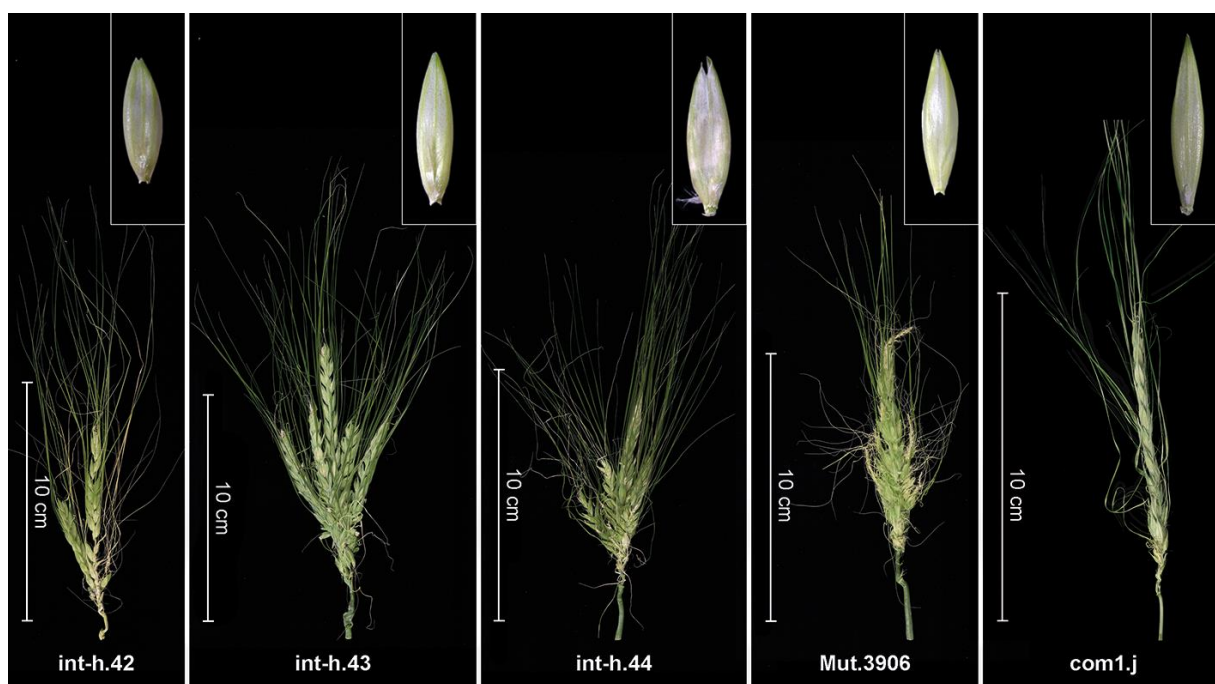

1180



1188 **Supplementary Figure 5.**

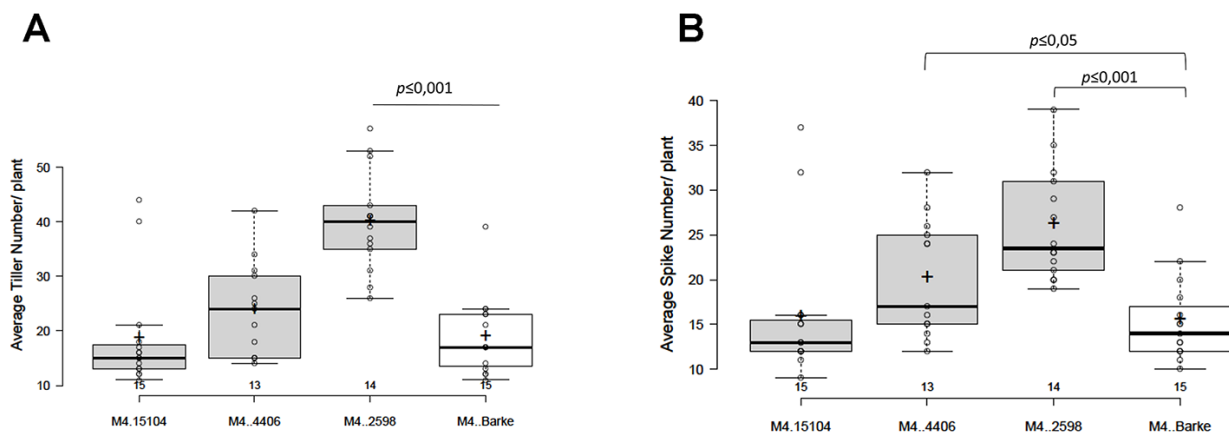

1189

1190

1191 **Supplementary Figure 6**

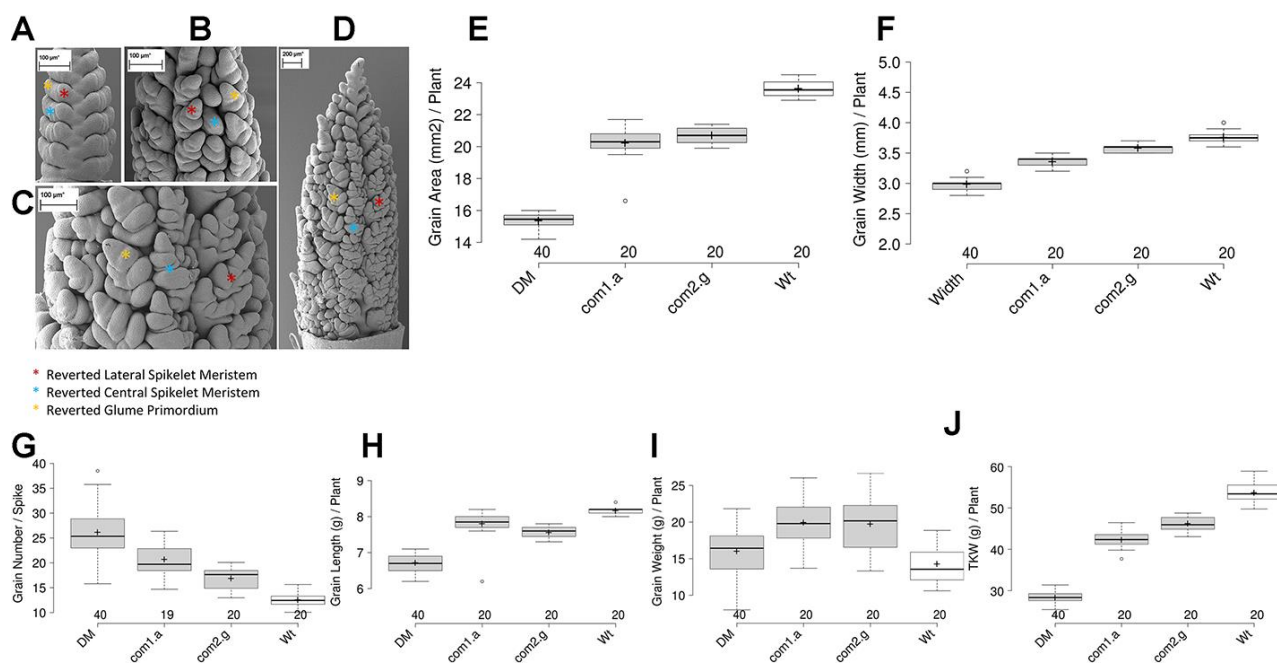

1192

1193

1194

1195

1196

1197 **Supplementary Figure 7**

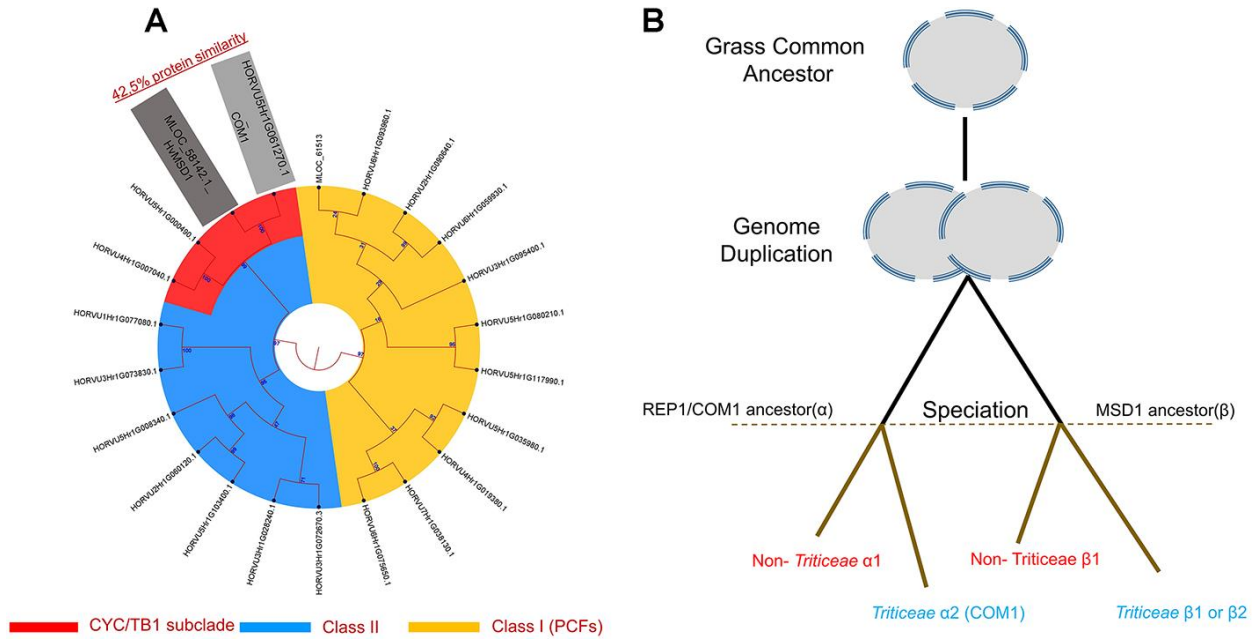

1198

1199

1200 **Supplementary Figure 8**

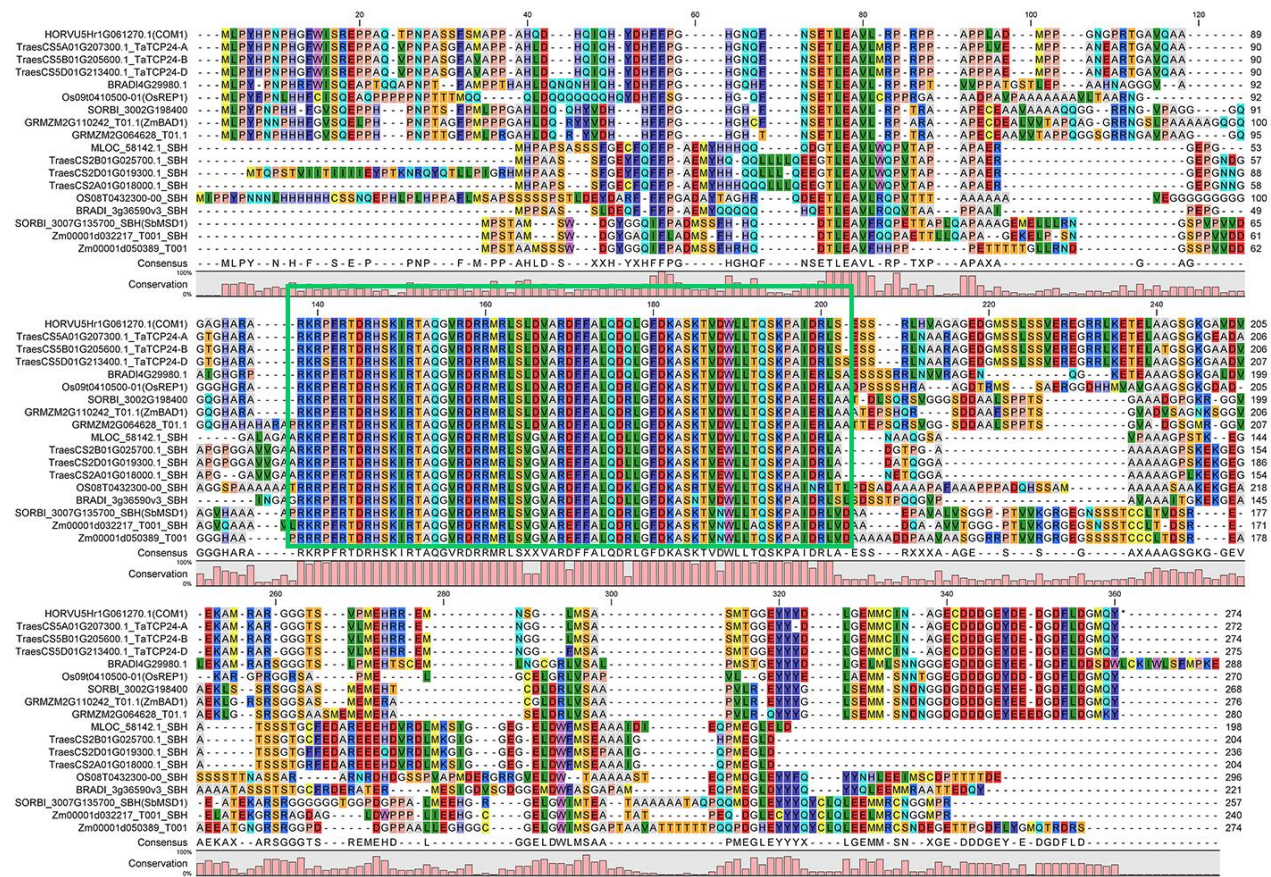

1201



1202 **Supplementary Figure 9**

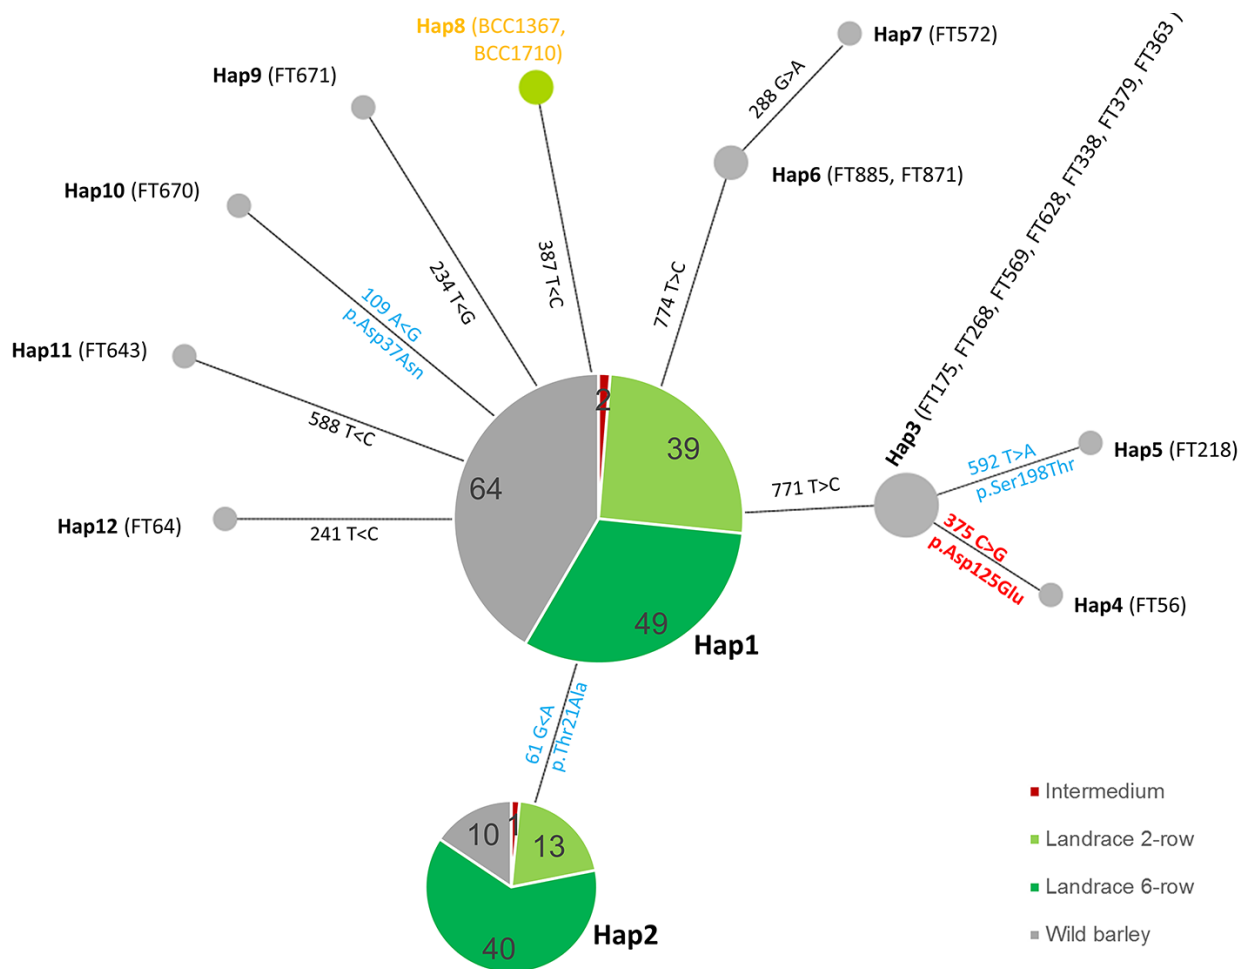

1203

1204

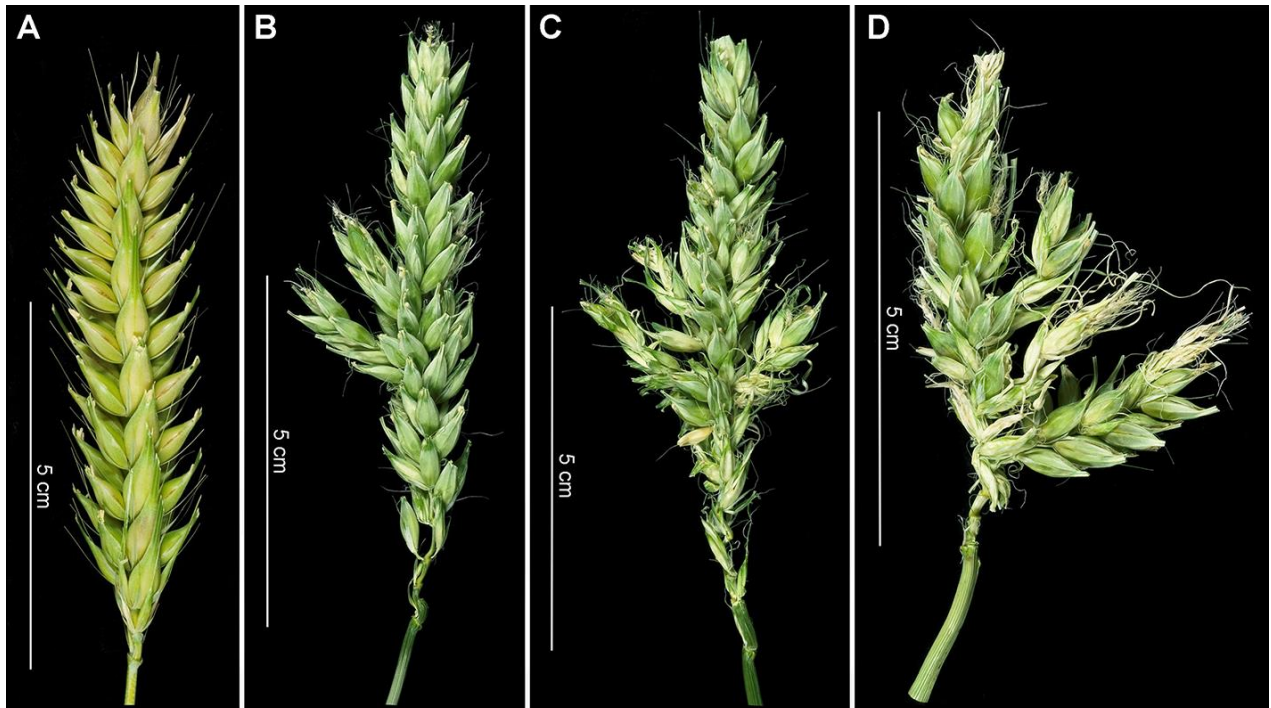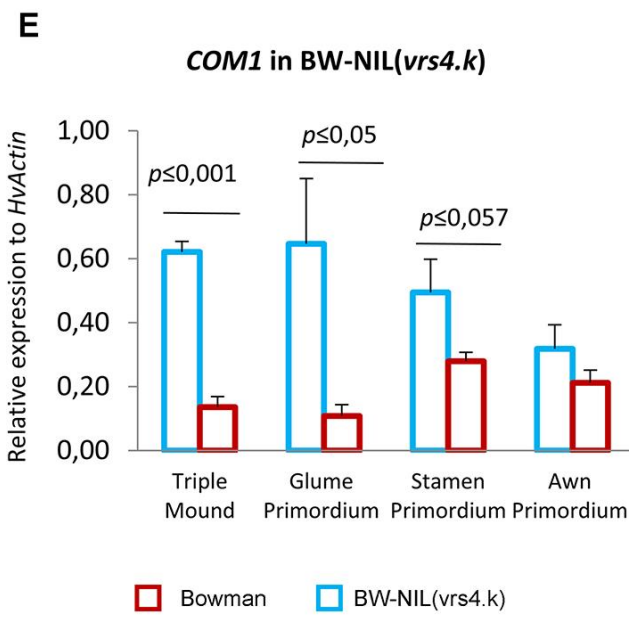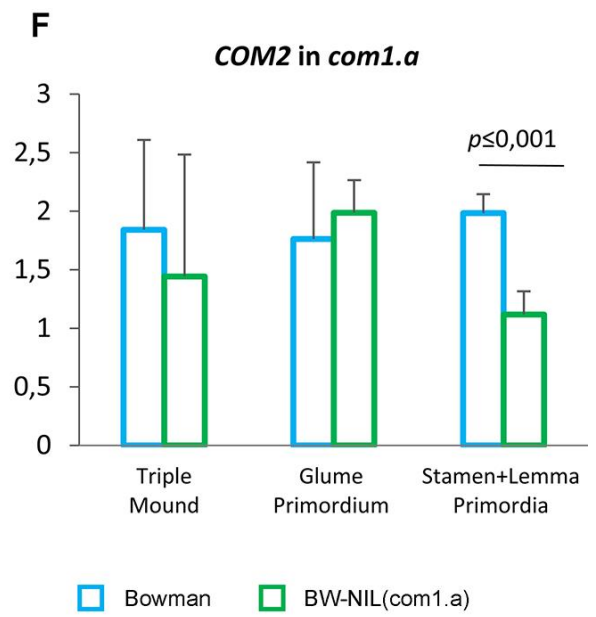

1206

1207

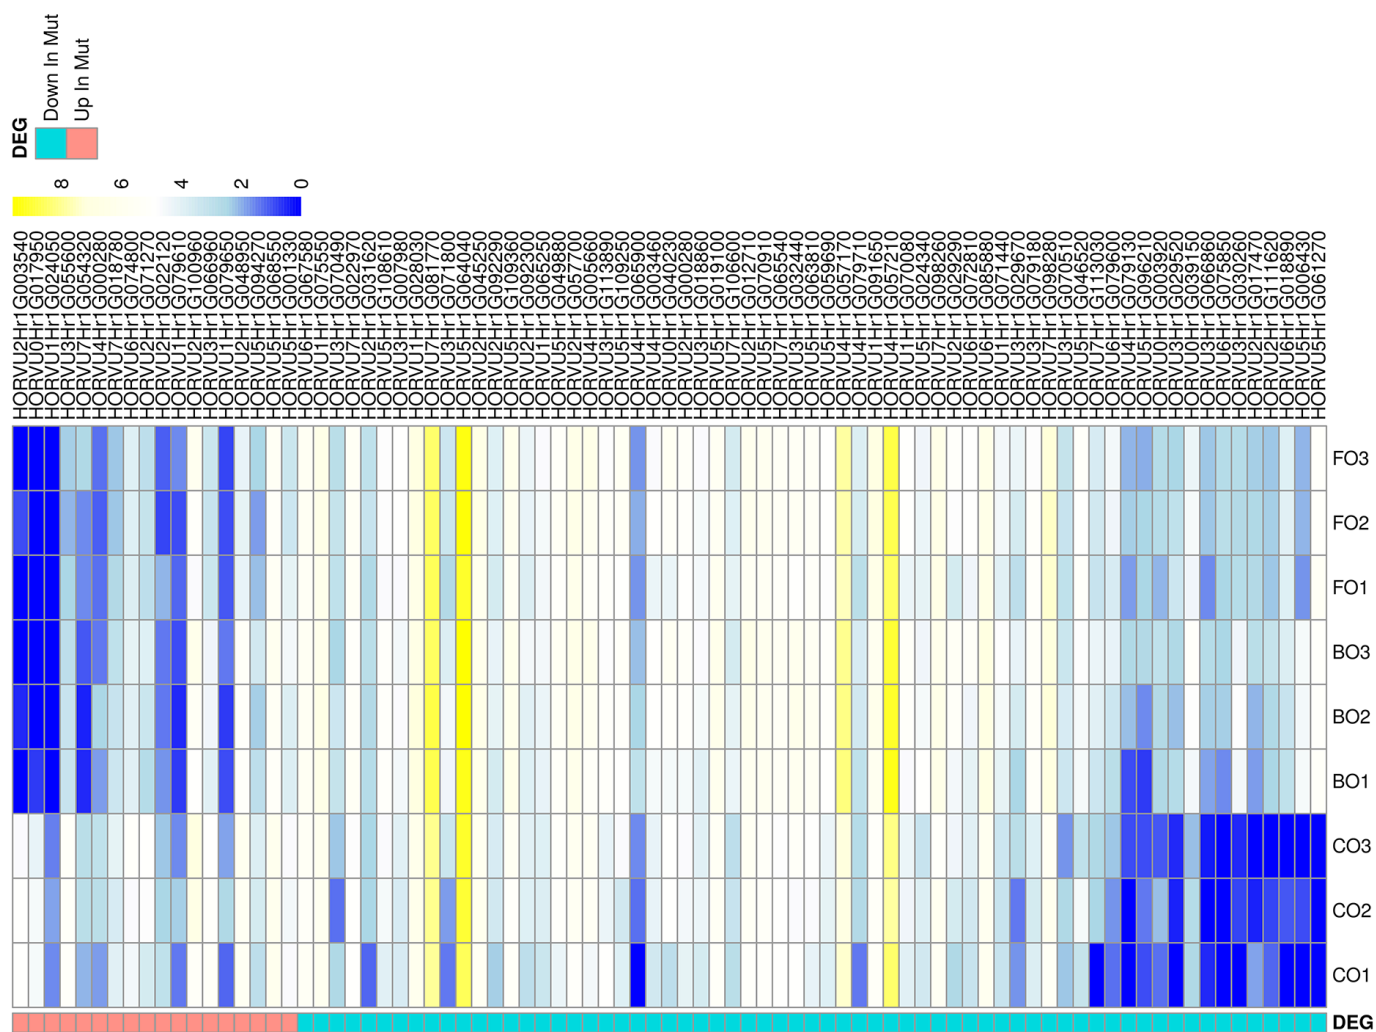

1209

1210

1211 **Supplementary Figure 12** available under aCC-BY-ND 4.0 International license.

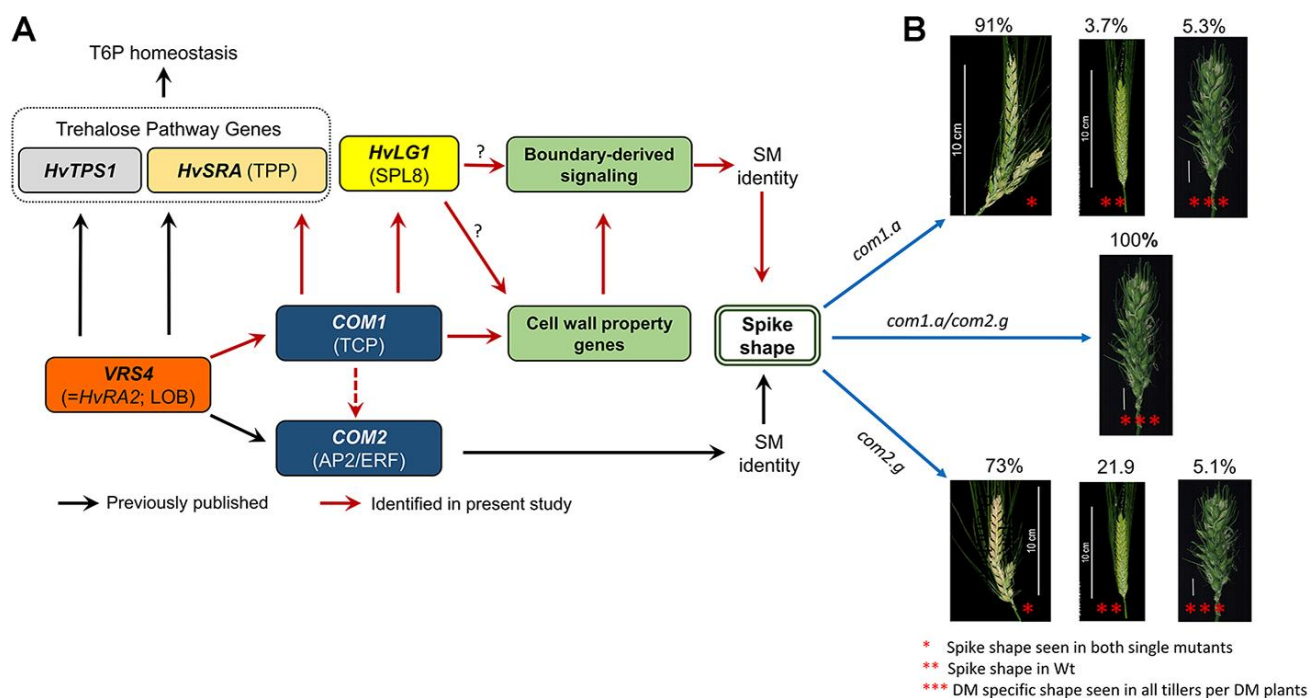

1212

1213

1214 **Supplementary tables**

1215 **Supplementary Table 1. List of the primers**

1216 **Supplementary Table 2. Graphical genotyping of the critical F<sub>2</sub> recombinants used to**  
 1217 **develop F<sub>3</sub> families**

1218 **Supplementary Table 3. Genotypic and phenotypic data of the F<sub>3</sub> progenies**

1219 **Supplementary Table 4. List of the TILLING as well as induced mutants per**  
 1220 **corresponding species**

1221 **Supplementary Table 5. Phenotypic data of the sorghum-TILLING mutants**

1222 **Supplementary Table 6. Haplotypes identified for COM1 in barley**

1223

1224

Supplementary Table 1. List of the primers

| Primer ID | Species | Application     | Marker Type | Orientation | tm     | Seq                         | RE    |
|-----------|---------|-----------------|-------------|-------------|--------|-----------------------------|-------|
| NGS0015   | Barley  | genetic mapping | CAPS        | FORWARD     | 60, 36 | ACTACAGGAGTGCTGCTGGTA<br>AA | SfaNI |
| NGS0015   | Barley  | genetic mapping | CAPS        | REVERSE     | 62, 07 | TTGCGGTATGCAACTCTCAAC<br>T  |       |
| NGS043    | Barley  | genetic mapping | CAPS        | FORWARD     | 61, 56 | TCGAGACTGAGGTAGTGGGAC<br>TT | PstI  |
| NGS043    | Barley  | genetic mapping | CAPS        | REVERSE     | 62, 06 | CCGAAGGTGGTCAATAGACAA<br>AG |       |
| NGS044    | Barley  | genetic mapping | CAPS        | FORWARD     | 61, 43 | GCAACTGGGATTCGATCTCTT<br>AG | EcoRV |
| NGS044    | Barley  | genetic mapping | CAPS        | REVERSE     | 61, 14 | CTAAAGCCTTGCACAAAGTTG<br>G  |       |
| NGS045    | Barley  | genetic mapping | CAPS        | FORWARD     | 62, 69 | ACACCGAGATGTTGTTGGAAG<br>AG | BtgI  |
| NGS045    | Barley  | genetic mapping | CAPS        | REVERSE     | 62, 07 | ATGGATACGGAAGCCAGTGTC<br>TA |       |
| NGS046    | Barley  | genetic mapping | CAPS        | FORWARD     | 62, 15 | GATACACTTAAGCCAAACGG<br>TTC | HinfI |
| NGS046    | Barley  | genetic mapping | CAPS        | REVERSE     | 61, 58 | TACGTCAGCTGGACACACACA<br>TA |       |
| NGS048    | Barley  | genetic mapping | CAPS        | FORWARD     | 62, 03 | CTCCTACGTGATTCACTGTGTC<br>G | SspI  |
| NGS048    | Barley  | genetic mapping | CAPS        | REVERSE     | 61, 62 | TTCAGAGGCTGAAGAAAGAG<br>AGC |       |
| NGS049    | Barley  | genetic mapping | CAPS        | FORWARD     | 61, 95 | GGTGATAAATCCACTCCAGCA<br>AC | BbsI  |
| NGS049    | Barley  | genetic mapping | CAPS        | REVERSE     | 61, 82 | GTCAAAGTGGAGAAGCTGCAA<br>A  |       |
| NGS051    | Barley  | genetic mapping | CAPS        | FORWARD     | 61, 97 | TGGTCGTTGGCTTCTCTAGTTT<br>C | PstI  |

|          |        |                 |      |             |           |                                |        |
|----------|--------|-----------------|------|-------------|-----------|--------------------------------|--------|
| NGS051   | Barley | genetic mapping | CAPS | REVE<br>RSE | 62,<br>17 | GAACGAAATCAACACAGGAG<br>ACAC   |        |
| NGS052   | Barley | genetic mapping | CAPS | FORW<br>ARD | 61,<br>95 | GAGAGTAGGCAGATCCAACG<br>AAA    | TagI   |
| NGS052   | Barley | genetic mapping | CAPS | REVE<br>RSE | 61,<br>96 | CGCGCTCCTAATTATACACAA<br>CC    |        |
| NGS054   | Barley | genetic mapping | CAPS | FORW<br>ARD | 61,<br>58 | TTGGAGTGAGGGTTCTGGTAA<br>TC    | PstI   |
| NGS054   | Barley | genetic mapping | CAPS | REVE<br>RSE | 61,<br>82 | CTCGACTGCTTCGTCCAGTTTA         |        |
| NGS084   | Barley | genetic mapping | CAPS | FORW<br>ARD | 62,<br>37 | CTTTATTCTCACGTCGTGCACT<br>C    |        |
| NGS084   | Barley | genetic mapping | CAPS | REVE<br>RSE | 60,<br>46 | TGAAGTAGATGCTCCGTCATC<br>CT    | BssHII |
| NGS094   | Barley | genetic mapping | CAPS | FORW<br>ARD | 61,<br>44 | TGCAAGAGCATCTTCCCTTCTT         | HhaI   |
| NGS094   | Barley | genetic mapping | CAPS | REVE<br>RSE | 60,<br>28 | CTTGCCAACATGCCAAGAGTA<br>G     |        |
| NGS158   | Barley | genetic mapping | CAPS | FORW<br>ARD | 61,<br>71 | TCAACTACACAAGTTCCCGAA<br>TTAAC | BsmAI  |
| NGS158   | Barley | genetic mapping | CAPS | REVE<br>RSE | 62,<br>41 | TGTGAGTCATCAAGGTCCAAG<br>G     |        |
| NGS160_F | Barley | genetic mapping | CAPS | FORW<br>ARD | 62,<br>1  | GTGGCATCATTAGCATAGGAT<br>TACTG | HgaI   |
| NGS160_R | Barley | genetic mapping | CAPS | REVE<br>RSE | 61,<br>72 | AATATGCAAGGTACACCACAA<br>AGAAG |        |
| NGS163   | Barley | genetic mapping | CAPS | FORW<br>ARD | 62,<br>12 | CGTATCCGGTGTATCGACGTA<br>TT    | BsrGI  |
| NGS163   | Barley | genetic mapping | CAPS | REVE<br>RSE | 62,<br>07 | TTATCTTCTCTAGAGTGCTGGC<br>TTGA |        |
| NGS164   | Barley | genetic mapping | CAPS | FORW<br>ARD | 63,<br>37 | AGCCATGGGCCATTATCTTAA<br>TTATC | HhaI   |
| NGS164   | Barley | genetic mapping | CAPS | REVE<br>RSE | 62,<br>83 | CATGGAATGCACAACCTCCTAT<br>GTC  |        |

|                |        |                       |      |         |        |                                    |              |
|----------------|--------|-----------------------|------|---------|--------|------------------------------------|--------------|
| NGS166         | Barley | genetic mapping       | CAPS | FORWARD | 61, 83 | AATTCCTGAAACAACGATCAA<br>GTTC      | Hpy99I       |
| NGS166         | Barley | genetic mapping       | CAPS | REVERSE | 62, 28 | CAAGTATGTAATGTTGTGGTG<br>AAGCA     |              |
| NGS168         | Barley | genetic mapping       | CAPS | FORWARD | 61, 82 | CAATATACGCCGTGTCATACT<br>CTCTT     | NdeI         |
| NGS168         | Barley | genetic mapping       | CAPS | REVERSE | 62, 27 | ATATGATCGAGTGGACTGGGA<br>GTT       |              |
| NGS169         | Barley | genetic mapping       | CAPS | FORWARD | 62, 35 | GAGTAGAGGCGCACAGGTGTC              | HpyCH<br>41V |
| NGS169         | Barley | genetic mapping       | CAPS | REVERSE | 61, 75 | CCAGACATTCTCATTGAAAGA<br>GCTAC     |              |
| NGS142_F       | Barley | genetic mapping       | CAPS | FORWARD |        | GACGGCCCTGGTATTAGATAT<br>G         | MboII        |
| NGS142_R       | Barley | genetic mapping       | CAPS | REVERSE |        | CCCATCATAACCAAACAGTCC<br>T         |              |
| TCP-CDS_F2     | Barley | COM1_CDS_resequencing | -    | FORWARD | 61, 93 | AGGAAGAAGAGAGTCCTCAA<br>CCAA       |              |
| TCP-CDS_R2     | Barley | COM1_CDS_resequencing | -    | REVERSE | 62, 88 | TAAGCTGCTCGATCGCTAGTA<br>CCT       |              |
| TCP-CDS_F      | Barley | COM1_CDS_resequencing | -    | FORWARD | 63, 62 | ATATTGTAAGTCAAGTGCAGGC<br>AGCTACTA |              |
| TCP-CDS_R      | Barley | COM1_CDS_resequencing | -    | REVERSE | 62, 13 | CATGCAATAATTAATAAGAA<br>CATGATGC   |              |
| FPC44150-37B_F | Barley | COM1_promotor region  | -    | FORWARD | 61     | CACTGTCTATGGAGAGACCAC<br>ATAGATT   |              |
| FPC44150-37B_R | Barley | COM1_promotor region  | -    | REVERSE | 61     | GTGAGCTAGGCAGCTAGGTAT<br>TTATTAG   |              |
| FPC44150-38_F  | Barley | COM1_promotor region  | -    | FORWARD | 62, 34 | TGTTTTCTACTAGTGTCAAGA<br>ACCCTACC  |              |
| FPC44150-38_R  | Barley | COM1_promotor region  | -    | REVERSE | 62, 54 | GAGAAAATGTGAGTTATCCTG<br>AACCAG    |              |
| xNGS129_F      | Barley | qPCR                  | -    | FORWARD | 60     | CGAGCGCATCATGTTCTTAGT<br>TAAT      |              |

|                              |              |                                 |   |         |           |                                |  |
|------------------------------|--------------|---------------------------------|---|---------|-----------|--------------------------------|--|
| xNGS129_R                    | Barley       | qPCR                            | - | REVERSE | 60        | AGCAACATAGAACAAAACCAT<br>GAGAT |  |
| Com1_ISH_1F20                | Barley       | In Situ                         | - | FORWARD |           | CACAGACGCGAGATGAACAG           |  |
| Com1_ISH_1R20                | Barley       | In Situ                         | - | REVERSE |           | AAAAGGCATCACCTCAAAA            |  |
| ActinGene                    | Barley       | qPCR                            |   | FORWARD |           |                                |  |
| ActinGene                    | Barley       | qPCR                            |   | REVERSE |           |                                |  |
| TILLING_Bd-TCP_F1            | Brachypodium | Screening of TILLING population | - | FORWARD | 57.<br>10 | GCAGCAGCAGCAAATACTA            |  |
| TILLING_Bd-TCP_R1            | Brachypodium | Screening of TILLING population | - | REVERSE | 57.<br>14 | GCTTGGACTGAGTGAGCAG            |  |
| TILLING_Bd-TCP_F2            | Brachypodium | Screening of TILLING population | - | FORWARD | 58.<br>48 | TTGACAAGGCCAGCAAG              |  |
| TILLING_Bd-TCP_R2            | Brachypodium | Screening of TILLING population | - | REVERSE | 58.<br>25 | AACCACACGCAACAAAGC             |  |
| BdACTIN2_F<br>(Bradi1g10630) | Brachypodium | qPCR                            |   | FORWARD |           | GTCGTTGCTCCTCCTGAAAG           |  |
| BdACTIN2_R<br>(Bradi1g10630) | Brachypodium | qPCR                            |   | REVERSE |           | ATCCACATCTGCTGGAAGGT           |  |
| Bd_TCP_InSitu_F              | Brachypodium | qPCR                            |   | FORWARD | 61.<br>67 | CAGACCAAGTTCAGCAGAGAT<br>GTAG  |  |
| Bd_TCP_InSitu_R              | Brachypodium | qPCR                            |   | REVERSE | 61.<br>72 | CCATCCAAATCAAGAGGTGTA<br>CTTT  |  |
| TILL_SbTCP_F1                | Sorghum      | Screening of TILLING population |   | FORWARD | 62.<br>25 | GAAGAAGCAGTAGCAGTGCC<br>AGTA   |  |
| TILL_SbTCP_R1                | Sorghum      | Screening of TILLING population |   | REVERSE | 62.<br>26 | CTTGCTGGCCTTATCGAAGC           |  |
| TILL_SbTCP_F2                | Sorghum      | Screening of TILLING population |   | FORWARD | 62.<br>11 | ATGCGGTTGTCCCTCGAC             |  |
| TILL_SbTCP_R2                | Sorghum      | Screening of TILLING population |   | REVERSE | 62.<br>10 | GATAGTGAAGAAGTGCTTGCC<br>AGA   |  |



|                  |              |                                                                            |  |         |       |                                                |  |
|------------------|--------------|----------------------------------------------------------------------------|--|---------|-------|------------------------------------------------|--|
| TILL_SbTCP_F3    | Sorghum      | Screening of TILLING population                                            |  | FORWARD | 62.17 | CACTACGTGGACCATCACTTC TTC                      |  |
| TILL_SbTCP_R3    | Sorghum      | Screening of TILLING population                                            |  | REVERSE | 62.64 | CTAGAGCTCAACTTCTCGGCA ACT                      |  |
| SbActin_F        | Sorghum      | qPCR                                                                       |  | FORWARD |       | TGGCATCTCTCAGCACATTC                           |  |
| SbActin_R        | Sorghum      | qPCR                                                                       |  | REVERSE |       | GGGCGGAAAGAATTAGAAGC                           |  |
| Sb_TCP_qPCR_F    | Sorghum      | qPCR                                                                       |  | FORWARD | 60,07 | CACTAGTAGCTAGCTCTTTCTT TATCTGG                 |  |
| Sb_TCP_qPCR_R    | Sorghum      | qPCR                                                                       |  | REVERSE | 60,42 | CCAGTAGCATTAACTTAAAGG AGTTCA                   |  |
| Com2-Bw_SfiI_F   | Barley       | To screen/sequence for A300C com2 Haplotype in com1.a/com2.g DM population |  | FORWARD | 62.51 | CTCCCAGATGATGGCGTTCT                           |  |
| Com2-Bw_SfiI_R   | Barley       | To screen/sequence for A300C com2 Haplotype in com1.a/com2.g DM population |  | REVERSE | 62.94 | GAACGGCGGGTAGTTGTTGTA G                        |  |
| iLL_TIL_BdTCP_F1 | Brachypodium | illumina sequencing for TILLING mutation detection                         |  |         |       | TTCCCTACACGACGCTCTTCCGATCTGC AGCAGCAGCAAATACTA |  |
| iLL_TIL_BdTCP_R1 | Brachypodium | illumina sequencing for TILLING mutation detection                         |  |         |       | AGTTCAGACGTGTGCTCTTCCGATCT GCTTGGACTGAGTGAGCAG |  |
| iLL_TIL_BdTCP_F2 | Brachypodium | illumina sequencing for TILLING mutation detection                         |  |         |       | TTCCCTACACGACGCTCTTCCGATCTTTT GACAAGGCCAGCAAG  |  |
| iLL_TIL_BdTCP_R2 | Brachypodium | illumina sequencing for TILLING mutation detection                         |  |         |       | AGTTCAGACGTGTGCTCTTCCGATCT AACCACACGCAACAAAGC  |  |

Supplementary Table 2. Graphical genotyping of the critical F2 recombinants used to develop F3 families

|                         | Critical F2 recombinants_selected to develop F3 |      |      |      |      |      |      |      |      |      |      |      |     |      |      |
|-------------------------|-------------------------------------------------|------|------|------|------|------|------|------|------|------|------|------|-----|------|------|
|                         | 1                                               | 2    | 3    | 4    | 5    | 6    | 7    | 8    | 9    | 10   | 11   | 12   | 13  | 14   | 15   |
| Marker ID               | 4839                                            | 5176 | 5250 | 5403 | 5409 | 5443 | 5504 | 4953 | 5326 | 5483 | 5070 | 5045 | 174 | 5407 | 5488 |
| NGS065                  | h                                               | h    | h    | h    | h    | h    | b    | b    | b    | b    | a    | a    | a   | a    | a    |
| NGS066                  | h                                               | h    | h    | h    | h    | h    | b    | b    | b    | b    | a    | a    | a   | a    | a    |
| NGS046                  | h                                               | h    | h    | h    | h    | h    | b    | b    | b    | b    | a    | a    | a   | a    | a    |
| NGS083                  | h                                               | h    | h    | h    | h    | h    | b    | b    | b    | b    | a    | a    | a   | a    | a    |
| d1652                   | h                                               | h    | h    | h    | h    | h    | b    | b    | b    | b    | a    | a    | a   | a    | a    |
| NGS049                  | h                                               | h    | h    | h    | h    | h    | b    | b    | b    | b    | a    | a    | a   | a    | a    |
| NGS084                  | h                                               | h    | h    | h    | h    | h    | b    | b    | b    | b    | a    | a    | a   | a    | a    |
| NGS168                  | h                                               | h    | h    | h    | h    | h    | b    | b    | b    | b    | a    | a    | a   | h    | a    |
| NGS169                  | h                                               | b    | b    | h    | h    | h    | b    | b    | h    | b    | h    | h    | h   | h    | a    |
| NGS166                  | h                                               | b    | b    | h    | h    | h    | b    | b    | h    | b    | h    | h    | h   | h    | a    |
| <i>com1.a/Phenotype</i> | c                                               | c    | c    | c    | c    | c    | c    | c    | c    | c    | c    | c    | c   | c    | a    |
| NGS164                  | h                                               | b    | b    | h    | h    | h    | b    | b    | h    | b    | h    | h    | h   | h    | a    |
| NGS163                  | h                                               | b    | b    | h    | h    | h    | b    | b    | h    | b    | h    | h    | h   | h    | a    |
| NGS160                  | h                                               | b    | b    | h    | h    | h    | b    | b    | h    | b    | h    | h    | h   | h    | a    |
| NGS158                  | b                                               | b    | b    | h    | h    | h    | b    | h    | h    | b    | h    | h    | h   | h    | a    |
| NGS094                  | b                                               | b    | b    | b    | b    | b    | h    | h    | h    | h    | h    | h    | h   | h    | h    |
| NGS111                  | b                                               | b    | b    | b    | b    | b    | h    | h    | h    | h    | h    | h    | h   | h    | h    |
| NGS112                  | b                                               | b    | b    | b    | b    | b    | h    | h    | h    | h    | h    | h    | h   | h    | h    |
| NGS099                  | b                                               | b    | b    | b    | b    | b    | h    | h    | h    | h    | h    | h    | h   | h    | h    |
| NGS142                  | b                                               | b    | b    | b    | b    | b    | h    | h    | h    | h    | h    | h    | h   | h    | h    |

Supplementary Table 3. Genotypic and phenotypic data of the F3 progenies

| CriticalRecF2_ID | GenotypeParentF2_closely linked marker (NGS164 & NGS166) | CriticalRec_ProgenyF3_ID | Genotype_ProgenyF3_NGS169 | Phenotype | Number of Spike | Number of Branched Spike |
|------------------|----------------------------------------------------------|--------------------------|---------------------------|-----------|-----------------|--------------------------|
| 174              | h                                                        | 174 - 1                  | h                         | Wt        | 16              | -                        |
| 174              | h                                                        | 174 - 2                  | h                         | Wt        | 18              | -                        |
| 174              | h                                                        | 174 - 3                  | h                         | Wt        | 17              | -                        |
| 174              | h                                                        | 174 - 4                  | a                         | branched  | 17              | 13                       |
| 174              | h                                                        | 174 - 5                  | b                         | Wt        | 20              | -                        |
| 174              | h                                                        | 174 - 6                  | h                         | Wt        | 17              | -                        |
| 174              | h                                                        | 174 - 7                  | b                         | Wt        | 22              | -                        |
| 174              | h                                                        | 174 - 8                  | b                         | Wt        | 21              | -                        |
| 174              | h                                                        | 174 - 9                  | a                         | branched  | 15              | 12                       |
| 174              | h                                                        | 174 - 10                 | a                         | branched  | 19              | 16                       |
| 174              | h                                                        | 174 - 12                 | a                         | branched  | 14              | 8                        |
| 174              | h                                                        | 174 - 13                 | h                         | Wt        | 12              | -                        |
| 174              | h                                                        | 174 - 14                 | h                         | Wt        | 16              | -                        |
| 174              | h                                                        | 174 - 15                 | h                         | Wt        | 14              | -                        |
| 174              | h                                                        | 174 - 16                 | b                         | Wt        | 17              | -                        |
| 4839             | h                                                        | 4839 - 1                 | h                         | Wt        | 15              | -                        |
| 4839             | h                                                        | 4839 - 2                 | b                         | Wt        | 15              | -                        |
| 4839             | h                                                        | 4839 - 3                 | a                         | branched  | 15              | 6                        |
| 4839             | h                                                        | 4839 - 4                 | b                         | Wt        | 15              | -                        |
| 4839             | h                                                        | 4839 - 5                 | a                         | branched  | 15              | 5                        |
| 4839             | h                                                        | 4839 - 6                 | b                         | Wt        | 13              | -                        |
| 4839             | h                                                        | 4839 - 7                 | h                         | Wt        | 15              | -                        |
| 4839             | h                                                        | 4839 - 8                 | h                         | Wt        | 15              | -                        |

|      |   |           |   |          |    |    |
|------|---|-----------|---|----------|----|----|
| 4839 | h | 4839 - 9  | a | branched | 20 | 12 |
| 4839 | h | 4839 - 10 | b | Wt       | 14 | -  |
| 4839 | h | 4839 - 11 | h | Wt       | 16 | -  |
| 4839 | h | 4839 - 12 | h | Wt       | 19 | -  |
| 4839 | h | 4839 - 13 | h | Wt       | 20 | -  |
| 4839 | h | 4839 - 14 | h | Wt       | 19 | -  |
| 4839 | h | 4839 - 15 | h | Wt       | 19 | -  |
| 4839 | h | 4839 - 16 | h | Wt       | 12 | -  |
| 4953 | b | 4953 - 1  | b | Wt       | 13 | -  |
| 4953 | b | 4953 - 2  | b | Wt       | 15 | -  |
| 4953 | b | 4953 - 3  | b | Wt       | 14 | -  |
| 4953 | b | 4953 - 4  | b | Wt       | 13 | -  |
| 4953 | b | 4953 - 5  | b | Wt       | 16 | -  |
| 4953 | b | 4953 - 6  | b | Wt       | 17 | -  |
| 4953 | b | 4953 - 7  | b | Wt       | 13 | -  |
| 4953 | b | 4953 - 8  | b | Wt       | 18 | -  |
| 4953 | b | 4953 - 9  | b | Wt       | 13 | -  |
| 4953 | b | 4953 - 10 | b | Wt       | 15 | -  |
| 4953 | b | 4953 - 11 | b | Wt       | 19 | -  |
| 4953 | b | 4953 - 12 | b | Wt       | 16 | -  |
| 4953 | b | 4953 - 13 | b | Wt       | 19 | -  |
| 4953 | b | 4953 - 14 | b | Wt       | 14 | -  |
| 4953 | b | 4953 - 15 | b | Wt       | 15 | -  |
| 4953 | b | 4953 - 16 | b | Wt       | 17 | -  |
| 5045 | h | 5045 - 1  | a | branched | 19 | 10 |
| 5045 | h | 5045 - 2  | h | Wt       | 14 | -  |
| 5045 | h | 5045 - 3  | h | Wt       | 11 | -  |
| 5045 | h | 5045 - 5  | h | Wt       | 14 | -  |
| 5045 | h | 5045 - 6  | h | Wt       | 16 | -  |

|      |   |           |   |          |    |    |
|------|---|-----------|---|----------|----|----|
| 5045 | h | 5045 - 7  | h | Wt       | 20 | -  |
| 5045 | h | 5045 - 8  | a | branched | 15 | 6  |
| 5045 | h | 5045 - 9  | h | Wt       | 15 | -  |
| 5045 | h | 5045 - 10 | h | Wt       | 18 | -  |
| 5045 | h | 5045 - 11 | a | branched | 12 | 5  |
| 5045 | h | 5045 - 13 | h | Wt       | 20 | -  |
| 5045 | h | 5045 - 14 | h | Wt       | 19 | -  |
| 5045 | h | 5045 - 15 | h | Wt       | 15 | -  |
| 5045 | h | 5045 - 16 | h | Wt       | 15 | -  |
| 5070 | h | 5070 - 1  | h | Wt       | 16 | -  |
| 5070 | h | 5070 - 2  | h | Wt       | 17 | -  |
| 5070 | h | 5070 - 3  | h | Wt       | 15 | -  |
| 5070 | h | 5070 - 4  | a | branched | 16 | 11 |
| 5070 | h | 5070 - 5  | b | Wt       | 20 | -  |
| 5070 | h | 5070 - 6  | h | Wt       | 21 | -  |
| 5070 | h | 5070 - 7  | a | branched | 17 | 9  |
| 5070 | h | 5070 - 8  | a | branched | 16 | 8  |
| 5070 | h | 5070 - 9  | b | Wt       | 18 | -  |
| 5070 | h | 5070 - 11 | b | Wt       | 25 | -  |
| 5070 | h | 5070 - 12 | a | branched | 14 | 9  |
| 5070 | h | 5070 - 13 | h | Wt       | 15 | -  |
| 5070 | h | 5070 - 14 | h | Wt       | 14 | -  |
| 5070 | h | 5070 - 15 | h | Wt       | 26 | -  |
| 5070 | h | 5070 - 16 | a | branched | 19 | 11 |
| 5176 | b | 5176 - 1  | b | Wt       | 13 | -  |
| 5176 | b | 5176 - 2  | b | Wt       | 16 | -  |
| 5176 | b | 5176 - 3  | b | Wt       | 21 | -  |
| 5176 | b | 5176 - 4  | b | Wt       | 13 | -  |
| 5176 | b | 5176 - 5  | b | Wt       | 14 | -  |

|      |   |           |   |    |    |   |
|------|---|-----------|---|----|----|---|
| 5176 | b | 5176 - 6  | b | Wt | 16 | - |
| 5176 | b | 5176 - 7  | b | Wt | 28 | - |
| 5176 | b | 5176 - 8  | b | Wt | 12 | - |
| 5176 | b | 5176 - 9  | b | Wt | 14 | - |
| 5176 | b | 5176 - 10 | b | Wt | 25 | - |
| 5176 | b | 5176 - 11 | b | Wt | 16 | - |
| 5176 | b | 5176 - 12 | b | Wt | 12 | - |
| 5176 | b | 5176 - 13 | b | Wt | 13 | - |
| 5176 | b | 5176 - 14 | b | Wt | 13 | - |
| 5176 | b | 5176 - 15 | b | Wt | 19 | - |
| 5176 | b | 5176 - 16 | b | Wt | 16 | - |
| 5250 | b | 5250 - 1  | b | Wt | 13 | - |
| 5250 | b | 5250 - 2  | b | Wt | 13 | - |
| 5250 | b | 5250 - 3  | b | Wt | 18 | - |
| 5250 | b | 5250 - 4  | b | Wt | 16 | - |
| 5250 | b | 5250 - 5  | b | Wt | 13 | - |
| 5250 | b | 5250 - 6  | b | Wt | 12 | - |
| 5250 | b | 5250 - 7  | b | Wt | 14 | - |
| 5250 | b | 5250 - 8  | b | Wt | 17 | - |
| 5250 | b | 5250 - 9  | b | Wt | 16 | - |
| 5250 | b | 5250 - 10 | b | Wt | 13 | - |
| 5250 | b | 5250 - 11 | b | Wt | 13 | - |
| 5250 | b | 5250 - 12 | b | Wt | 15 | - |
| 5250 | b | 5250 - 13 | b | Wt | 21 | - |
| 5250 | b | 5250 - 14 | b | Wt | 18 | - |
| 5250 | b | 5250 - 15 | b | Wt | 15 | - |
| 5250 | b | 5250 - 16 | b | Wt | 16 | - |
| 5326 | h | 5326 - 1  | h | Wt | 16 | - |
| 5326 | h | 5326 - 2  | b | Wt | 17 | - |

|      |   |           |   |          |    |    |
|------|---|-----------|---|----------|----|----|
| 5326 | h | 5326 - 3  | h | Wt       | 15 | -  |
| 5326 | h | 5326 - 4  | h | Wt       | 15 | -  |
| 5326 | h | 5326 - 5  | b | Wt       | 13 | -  |
| 5326 | h | 5326 - 6  | b | Wt       | 16 | -  |
| 5326 | h | 5326 - 7  | h | Wt       | 17 | -  |
| 5326 | h | 5326 - 8  | h | Wt       | 16 | -  |
| 5326 | h | 5326 - 9  | a | branched | 16 | 8  |
| 5326 | h | 5326 - 10 | b | Wt       | 11 | -  |
| 5326 | h | 5326 - 11 | b | Wt       | 15 | -  |
| 5326 | h | 5326 - 12 | h | Wt       | 16 | -  |
| 5326 | h | 5326 - 13 | a | branched | 13 | 10 |
| 5326 | h | 5326 - 14 | b | Wt       | 12 | -  |
| 5326 | h | 5326 - 15 | b | Wt       | 11 | -  |
| 5326 | h | 5326 - 16 | h | Wt       | 15 | -  |
| 5403 | h | 5403 - 1  | h | Wt       | 15 | -  |
| 5403 | h | 5403 - 2  | h | Wt       | 16 | -  |
| 5403 | h | 5403 - 3  | a | branched | 17 | 13 |
| 5403 | h | 5403 - 4  | h | Wt       | 13 | -  |
| 5403 | h | 5403 - 5  | b | Wt       | 17 | -  |
| 5403 | h | 5403 - 6  | a | branched | 14 | 9  |
| 5403 | h | 5403 - 7  | a | branched | 16 | 10 |
| 5403 | h | 5403 - 8  | h | Wt       | 15 | -  |
| 5403 | h | 5403 - 9  | h | Wt       | 13 | -  |
| 5403 | h | 5403 - 10 | b | Wt       | 16 | -  |
| 5403 | h | 5403 - 12 | b | Wt       | 18 | -  |
| 5403 | h | 5403 - 13 | h | Wt       | 15 | -  |
| 5403 | h | 5403 - 14 | b | Wt       | 15 | -  |
| 5403 | h | 5403 - 15 | a | branched | 15 | 9  |
| 5403 | h | 5403 - 16 | b | Wt       | 16 | -  |

|      |   |           |   |          |    |    |
|------|---|-----------|---|----------|----|----|
| 5407 | h | 5407 - 1  | a | branched | 15 | 8  |
| 5407 | h | 5407 - 2  | h | Wt       | 19 | -  |
| 5407 | h | 5407 - 3  | b | Wt       | 13 | -  |
| 5407 | h | 5407 - 4  | h | Wt       | 14 | -  |
| 5407 | h | 5407 - 5  | h | Wt       | 14 | -  |
| 5407 | h | 5407 - 6  | a | branched | 15 | 11 |
| 5407 | h | 5407 - 7  | h | Wt       | 14 | -  |
| 5407 | h | 5407 - 8  | h | Wt       | 15 | -  |
| 5407 | h | 5407 - 9  | h | Wt       | 15 | -  |
| 5407 | h | 5407 - 10 | b | Wt       | 13 | -  |
| 5407 | h | 5407 - 11 | h | Wt       | 16 | -  |
| 5407 | h | 5407 - 12 | a | branched | 18 | 10 |
| 5407 | h | 5407 - 13 | a | branched | 16 | 12 |
| 5407 | h | 5407 - 14 | h | Wt       | 15 | -  |
| 5407 | h | 5407 - 15 | h | Wt       | 14 | -  |
| 5407 | h | 5407 - 16 | h | Wt       | 15 | -  |
| 5409 | h | 5409 - 1  | - | Wt       | 16 | -  |
| 5409 | h | 5409 - 2  | h | Wt       | 13 | -  |
| 5409 | h | 5409 - 3  | h | Wt       | 13 | -  |
| 5409 | h | 5409 - 4  | b | Wt       | 13 | -  |
| 5409 | h | 5409 - 5  | h | Wt       | 14 | -  |
| 5409 | h | 5409 - 6  | a | branched | 15 | 11 |
| 5409 | h | 5409 - 7  | a | branched | 19 | 7  |
| 5409 | h | 5409 - 8  | h | Wt       | 13 | -  |
| 5409 | h | 5409 - 9  | h | Wt       | 16 | -  |
| 5409 | h | 5409 - 11 | h | Wt       | 19 | -  |
| 5409 | h | 5409 - 13 | h | Wt       | 13 | -  |
| 5409 | h | 5409 - 14 | a | branched | 16 | 11 |
| 5409 | h | 5409 - 15 | b | Wt       | 13 | -  |



|      |   |           |   |          |    |    |
|------|---|-----------|---|----------|----|----|
| 5409 | h | 5409 - 16 | b | Wt       | 14 | -  |
| 5443 | h | 5443 - 1  | h | Wt       | 14 | -  |
| 5443 | h | 5443 - 2  | a | branched | 12 | 7  |
| 5443 | h | 5443 - 3  | h | Wt       | 14 | -  |
| 5443 | h | 5443 - 4  | b | Wt       | 13 | -  |
| 5443 | h | 5443 - 5  | h | Wt       | 13 | -  |
| 5443 | h | 5443 - 6  | h | Wt       | 18 | -  |
| 5443 | h | 5443 - 7  | a | branched | 17 | 10 |
| 5443 | h | 5443 - 8  | a | branched | 12 | 9  |
| 5443 | h | 5443 - 9  | b | Wt       | 14 | -  |
| 5443 | h | 5443 - 11 | h | Wt       | 12 | -  |
| 5443 | h | 5443 - 12 | h | Wt       | 14 | -  |
| 5443 | h | 5443 - 13 | h | Wt       | 14 | -  |
| 5443 | h | 5443 - 14 | a | branched | 16 | 12 |
| 5443 | h | 5443 - 15 | a | branched | 14 | 10 |
| 5443 | h | 5443 - 16 | b | Wt       | 15 | -  |
| 5483 | b | 5483 - 1  | b | Wt       | 15 | -  |
| 5483 | b | 5483 - 2  | b | Wt       | 15 | -  |
| 5483 | b | 5483 - 3  | b | Wt       | 15 | -  |
| 5483 | b | 5483 - 4  | b | Wt       | 13 | -  |
| 5483 | b | 5483 - 5  | b | Wt       | 11 | -  |
| 5483 | b | 5483 - 6  | b | Wt       | 13 | -  |
| 5483 | b | 5483 - 7  | b | Wt       | 16 | -  |
| 5483 | b | 5483 - 8  | b | Wt       | 14 | -  |
| 5483 | b | 5483 - 9  | b | Wt       | 15 | -  |
| 5483 | b | 5483 - 10 | b | Wt       | 14 | -  |
| 5483 | b | 5483 - 11 | b | Wt       | 14 | -  |
| 5483 | b | 5483 - 12 | b | Wt       | 16 | -  |
| 5483 | b | 5483 - 13 | b | Wt       | 12 | -  |

|      |   |           |   |          |    |    |
|------|---|-----------|---|----------|----|----|
| 5483 | b | 5483 - 14 | b | Wt       | 14 | -  |
| 5483 | b | 5483 - 15 | b | Wt       | 15 | -  |
| 5483 | b | 5483 - 16 | b | Wt       | 13 | -  |
| 5488 | a | 5488 - 2  | a | branched | 22 | 15 |
| 5488 | a | 5488 - 3  | a | branched | 23 | 14 |
| 5488 | a | 5488 - 5  | a | branched | 19 | 14 |
| 5488 | a | 5488 - 6  | a | branched | 12 | 10 |
| 5488 | a | 5488 - 7  | a | branched | 21 | 15 |
| 5488 | a | 5488 - 8  | a | branched | 17 | 13 |
| 5488 | a | 5488 - 9  | a | branched | 20 | 11 |
| 5488 | a | 5488 - 10 | a | branched | 20 | 10 |
| 5488 | a | 5488 - 11 | a | branched | 23 | 13 |
| 5488 | a | 5488 - 12 | a | branched | 25 | 16 |
| 5488 | a | 5488 - 13 | a | branched | 20 | 14 |
| 5488 | a | 5488 - 14 | a | branched | 20 | 12 |
| 5488 | a | 5488 - 15 | a | branched | 21 | 12 |
| 5488 | a | 5488 - 16 | a | branched | 20 | 10 |
| 5504 | b | 5504 - 1  | b | Wt       | 15 | -  |
| 5504 | b | 5504 - 2  | b | Wt       | 19 | -  |
| 5504 | b | 5504 - 3  | b | Wt       | 24 | -  |
| 5504 | b | 5504 - 4  | b | Wt       | 21 | -  |
| 5504 | b | 5504 - 5  | b | Wt       | 21 | -  |
| 5504 | b | 5504 - 6  | b | Wt       | 17 | -  |
| 5504 | b | 5504 - 7  | b | Wt       | 19 | -  |
| 5504 | b | 5504 - 8  | b | Wt       | 11 | -  |

Supplementary Table 4. Part 1. List of the TILLING as well as induced mutants per corresponding species

| Species | TILLING Line ID | DNA Position (from Start Codon) | SNP type | Homo/Hetero | Wild aa | Mutant aa | Location within the gene | the grass sp. with deviated aa | SIFT prediction | SIFT score |
|---------|-----------------|---------------------------------|----------|-------------|---------|-----------|--------------------------|--------------------------------|-----------------|------------|
| Barley  | M3.15104        | 305                             | G-to-A   | homo        | R       | K         | within TCP Domain        | no change in grass; R          | NA              | NA         |
| Barley  | M3.4406         | 334                             | G-to-A   | homo        | A       | T         | within TCP Domain        | no change in grass; A          | NA              | NA         |
| Barley  | M3.2598         | 346                             | C-to-T   | homo        | R       | W         | within TCP Domain        | no change in grass; R          | NA              | NA         |
| Barley  | M3.13729        | 335                             | C-to-T   | homo        | A       | V         | within TCP Domain        | no change in grass; A          | NA              | NA         |
| Barley  | M3.4063         | 211                             | C-to-T   | hetro       | P       | S         | befor TCP Domain         | OS: D                          | NA              | NA         |
| Barley  | M3.9299         | 595                             | G-to-A   | hetro       | G       | R         | after TCP Domain         | no change in grass; G          | NA              | NA         |
| Barley  | M3.14287        | 109                             | G-to-A   | hetro       | D       | N         | befor TCP Domain         | OS: Q                          | NA              | NA         |
| Barley  | M3.2821         | 241                             | C-to-T   | hetro       | p       | S         | befor TCP Domain         | in OS, Tu, BD and SB: A        | NA              | NA         |
| Barley  | M3.14325        | 242                             | C-to-A   | hetro       | p       | Q         | befor TCP Domain         | in OS, Tu, BD and SB: A        | NA              | NA         |
| Barley  | M3.6995         | 290                             | G-to-A   | homo        | R       | K         | befor TCP Domain         | no change in grass; R          | NA              | NA         |
| Barley  | M3.12123        | 290                             | G-to-A   | hetro       | R       | K         | befor TCP Domain         | no change in grass; R          | NA              | NA         |
| Barley  | M3.13483        | 290                             | G-to-A   | hetro       | R       | K         | befor TCP Domain         | no change in grass; R          | NA              | NA         |
| Barley  | M3.2927         | 496                             | C-to-T   | homo        | L       | F         | after TCP Domain         | OS: S, ZM: E, Sb: L            | NA              | NA         |
| Barley  | M3.13996        | 511                             | G-to-A   | hetro       | A       | T         | after TCP Domain         | ZM: R, Sb: V                   | NA              | NA         |
| Barley  | M3.14152        | 514                             | G-to-A   | homo        | G       | R         | after TCP Domain         | OS: A, ZM: -                   | NA              | NA         |
| Barley  | M3.6504         | 515                             | G-to-A   | hetro       | G       | E         | after TCP Domain         | OS: A, ZM: -                   | NA              | NA         |
| Barley  | M3.3717         | 528                             | G-to-A   | hetro       | M       | I         | after TCP Domain         | in OS: R, BD: -, SB: -, ZM: -  | NA              | NA         |
| Barley  | M3.11298        | 544                             | G-to-A   | hetro       | V       | M         | after TCP Domain         | in OS: A, BD: -, SB: D, ZM: D  | NA              | NA         |
| Barley  | M3.11933        | 544                             | G-to-A   | homo        | V       | M         | after TCP Domain         | in OS: A, BD: -, SB: D, ZM: D  | NA              | NA         |
| Barley  | M3.13403        | 544                             | G-to-A   | hetro       | V       | M         | after TCP Domain         | in OS: A, BD: -, SB: D, ZM: D  | NA              | NA         |
| Barley  | M3.6448         | 573                             | G-to-T   | hetro       | E       | D         | after TCP Domain         | in OS: V, SB: S, ZM: S         | NA              | NA         |
| Barley  | M3.12394        | 595                             | G-to-A   | hetro       | G       | R         | after TCP Domain         | no change in grass; G          | NA              | NA         |

|              |          |     |        |       |       |   |                   |                               |           |      |
|--------------|----------|-----|--------|-------|-------|---|-------------------|-------------------------------|-----------|------|
| Barley       | M3.3609  | 635 | G-to-A | homo  | R     | k | after TCP Domain  | no change in grass; R         | NA        | NA   |
| Barley       | M3.9852  | 641 | G-to-A | hetro | G     | D | after TCP Domain  | no change in grass; G         | NA        | NA   |
| Barley       | M3.11856 | 670 | C-to-T | homo  | R     | C | after TCP Domain  | in OS: -, BD: L, SB: -, ZM: - | NA        | NA   |
| Sorghum      | ARS152   | 188 | G-to-A | hetro | R     | H | Befor TCP Domain  | not conserved                 | NA        | NA   |
| Sorghum      | ARS180   | 430 | A-to-G | homo  | A     | T | within TCP Domain | no change in grass; A         | NA        | NA   |
| Sorghum      | ARS137   | 577 | C-to-T | hetro | P     | S | after TCP Domain  | not conserved                 | NA        | NA   |
| Brachypodium | 8004     | 173 | C_To_T |       | S58F  |   | Befor TCP Domain  |                               | Damaging  | 0    |
| Brachypodium | 8231     | 187 | G_To_A |       | A63T  |   | Befor TCP Domain  |                               | Damaging  | 0    |
| Brachypodium | 8566     | 266 | G_To_A |       | G89D  |   | Befor TCP Domain  |                               | Damaging  | 0,01 |
| Brachypodium | 7576     | 278 | C_To_T |       | A93V  |   | Befor TCP Domain  |                               | Damaging  | 0,01 |
| Brachypodium | 4957     | 295 | C_To_T |       | P99S  |   | Befor TCP Domain  |                               | Damaging  | 0,05 |
| Brachypodium | 5446     | 346 | C_To_T |       | Q116* |   | within TCP Domain |                               | -         | -    |
| Brachypodium | 8373     | 437 | G_To_A |       | S146N |   | within TCP Domain |                               | Damaging  | 0,02 |
| Brachypodium | 5149     | 472 | C_To_T |       | P158S |   | within TCP Domain |                               | Tolerated | 0,07 |
| Brachypodium | 5337     | 533 | C_To_T |       | A178V |   | within TCP Domain |                               | Tolerated | 0,15 |
| Brachypodium | 6339     | 536 | G_To_A |       | G179E |   | within TCP Domain |                               | Tolerated | 0,07 |
| Brachypodium | 4196     | 785 | G_To_A |       | G262D |   | after TCP Domain  |                               | Damaging  | 0    |

| Supplementary Table 4. Part 2. |                                |           |        |           |                                                                    |                  |                                               |                     |
|--------------------------------|--------------------------------|-----------|--------|-----------|--------------------------------------------------------------------|------------------|-----------------------------------------------|---------------------|
| Running Number                 | Branched (compositum) Barleys: | Gene Bank | Type   | ID        | type of mutation and the doner line                                | Cross with com1a | PCR with TCP_potential promotor based primers | TCP_CDS_Resequening |
| 4                              | Mut.3906                       | GER       | Spring | MHO R347  | X-ray; spike with short branches; 1949- 'Heines Haisa';            | Done/allelic     | Amplicon observed                             | No Amplicon         |
| 8                              | com1.j                         | USA       | Spring | NGB2 2020 | X-ray; induced mutant in Donaria (PI 161974) isolated by F. Scholz |                  | No Amplicon                                   | No Amplicon         |
| int-h 42                       | int-h 42                       | SWE       | #N/A   | #N/A      | /neutrons/ KRISTINA                                                |                  | No Amplicon                                   | No Amplicon         |
| int-h 43                       | int-h 43                       | SWE       | #N/A   | #N/A      | /hydroxy n-propyl methanesulfonate/ KRISTINA                       |                  | No Amplicon                                   | No Amplicon         |
| int-h 44                       | int-h 44                       | SWE       | #N/A   | #N/A      | /ethyl methanesulfonate/ KRISTINA                                  |                  | No Amplicon                                   | No Amplicon         |

| Supplementary Table 5. Phenotypic data of the sorghum-TILLING mutants |                                             |                                |                                           |                                           |                                                         |                                         |                                   |                                                        |                                                                   |                              |
|-----------------------------------------------------------------------|---------------------------------------------|--------------------------------|-------------------------------------------|-------------------------------------------|---------------------------------------------------------|-----------------------------------------|-----------------------------------|--------------------------------------------------------|-------------------------------------------------------------------|------------------------------|
|                                                                       |                                             |                                | M5 generation _to measure branch number   |                                           |                                                         | M6 generation _to measure branch angle  |                                   |                                                        |                                                                   |                              |
| TILLIN<br>G Line<br>ID_M4                                             | DNA<br>Position<br>(from<br>Start<br>Codon) | Location<br>within the<br>gene | Number of<br>plants<br>_all<br>homozygous | Average No of<br>nodes/panicle/<br>family | Average No of<br>branch per<br>nodes/panicle/<br>family | Number of<br>plants _ all<br>homozygous | No of<br>nodes/panic<br>le/family | Average No of<br>angle per<br>nodes/panicle/<br>family | Average angle<br>size (degree)<br>per<br>nodes/panicle/<br>family | Grain formation              |
| ARS180                                                                | A430G                                       | within<br>TCP<br>Domain        | 8                                         | 12                                        | 4,2*                                                    | 7                                       | 3 basal                           | 10,1                                                   | 5,2***                                                            | only 20-40<br>grains/panicle |
| ARS137                                                                | C577T                                       | after TCP<br>Domain            | 8                                         | 11,5                                      | 4,4*                                                    | 6                                       | 3 basal                           | 9,3                                                    | 15,9                                                              | Complete fertility           |
| Wt<br>BT623                                                           | -                                           | -                              | 7                                         | 10                                        | 5,4                                                     | 5                                       | 3 basal                           | 8,1                                                    | 10,95                                                             | Complete fertility           |
| * ; ttest (P < 0.05)                                                  |                                             |                                |                                           |                                           |                                                         |                                         |                                   |                                                        |                                                                   |                              |
| *** ; ttest (P < 0.001)                                               |                                             |                                |                                           |                                           |                                                         |                                         |                                   |                                                        |                                                                   |                              |

1225 **Supplementary source data**

1226 **Supplementary source data 1. Differentially expressed genes in Wt and barley mutant with**

1227 **the corresponding statistical values**

1228
